# Supplementary material
Source: PubMed Central journal article supplement (PMC2688882)
Supplement: 0810821106_Appendix_PDF.pdf [file 0810821106_Appendix_PDF.pdf]

**Supplementary information S2: Amphibian species list for two major centers of amphibian diversity, (1) Ranomafana National Park and (2) Analamazaotra/Mantadia National Park with surrounding forests**

**(1) Ranomafana National Park** (112 species of which 31 CCS and UCS)

This list contains records from various sites within and directly adjacent to Ranomafana National Park (with maximum distances of less than 20 km between sites), and from three localities that are at ca. 10, 20 and 40 km east of Ranomafana village (Mahakajy, Ifanadiana, Ambohitsara). Several species that so far have only been recorded from these three sites (marked with asterisks) can be expected to occur in poorly explored low-altitude sites within the Park as well. CCS and UCS are marked reddish-brown.

Sites are coded as follows:

- (1) Ranomafana village , 21°15'41"S,47°27'34"E.
- (2) Ambatolahy forest, 21°14'37"S,47°25'34"E.
- (3) Ranomafana National Park entrance, 21°9'10"S,47°31'39"E.
- (4) Talatakely, 21°15'50"S,47°25"E.
- (5) Vohiparara, 21°15'30"S,47°24"E.
- (6) Ranomafanakely, 21°14'55"S,47°22'18"E.
- (7) Maharira, 21°19'32"S,47°24'8"E.
- (8) Mangevo, 21°23'13"S,47°27'18"E.
- (9) Ambohitsara, 21°21'25"S,47°48'56"E.
- (10) Mahakajy Private Reserve, 21°16'45"S,47°31'49"E.
- (11) road Ifanadiana - Tolongoina, 21°21'12"S,47°36'28"E.

Family Ptychadenidae

*Ptychadena mascareniensis* (1, 2, 9)

Family Hyperoliidae

*Heterixalus alboguttatus* (1, 9)

*Heterixalus betsileo* (1, 2)

Family Microhylidae

*Anodonthyla boulengeri* (1, 10)

*Anodonthyla moramora* (5)

*Anodonthyla* sp. 1 (7)

*Anodonthyla* sp. 4 (7)

*Platypelis pollicaris* (4, 7)

*Platypelis grandis* (5, 4)

*Platypelis tuberifera* (4)

*Platypelis* cf. *cowani* (9)\*

*Plethodontohyla brevipes* (2)

*Plethodontohyla* cf. *bipunctata* (7, 4)

*Plethodontohyla inguinalis* (5)

*Plethodontohyla mihanika* (4)  
*Plethodontohyla ocellata* (8)\*  
*Plethodontohyla notosticta* (8)

*Stumpffia* sp. 9 (1, 10)  
*Stumpffia* cf. *tridactyla* (7)  
*Stumpffia* cf. *tetradactyla* (9)\*

*Paradoxophyla palmata* (1, 6)  
*Scaphiophryne spinosa* (1, 4)

#### Family Mantellidae

*Aglyptodactylus madagascariensis* (5)  
*Aglyptodactylus* sp. 3 (1)  
*Boophis albilabris* (2, 4)  
*Boophis albipunctatus* (8)\*  
*Boophis andohahela* (2)  
*Boophis bottae* (5, 6)  
*Boophis elenae* (5, 7)  
*Boophis guibei* (3, 7)  
*Boophis lilianae* (11)\*  
*Boophis madagascariensis* (3, 6)  
*Boophis majori* (5, 7)  
*Boophis* cf. *mandraka* (2)  
*Boophis marojezensis* (2, 7)  
*Boophis microtypanum* (7)  
*Boophis opisthodon* (11)\*  
*Boophis pauliani* (7)  
*Boophis periegetes* (7)  
*Boophis picturatus* (5, 7, 9)  
*Boophis pyrrhus* (11)  
*Boophis rappiodes* (1, 6)  
*Boophis reticulatus* (2, 5)  
*Boophis rhodoscelis* (6)  
*Boophis schuboeae* (2, 5)  
*Boophis tasymena* (5, 6)  
*Boophis tephraeomystax* (1)  
*Boophis viridis* (9)\*  
*Boophis* sp. 8 (6)  
*Boophis* sp. 13 (6)  
*Boophis* sp. 15 (2)  
*Boophis* sp. 16 (2, 5, 9)  
*Boophis* sp. 17 (2)  
*Boophis* sp. 22 (1, 2, 6)  
*Boophis* sp. 29 (10)\*  
*Boophis* sp. 30 (6)  
*Boophis* sp. 35 (4, 6)  
*Boophis* sp. 37

*Boophis* sp. 38

*Boophis* sp. 42

*Blommersia blommersae* (1, 5)

*Blommersia domerguei* (7)

*Blommersia grandisonae* (11)\*

*Blommersia* sp. 9 (5)

*Gephyromantis blanci* (5, 6, 7)

*Gephyromantis* cf. *boulengeri* (2, 9, 11)

*Gephyromantis enki* (4, 5, 6, 7)

*Gephyromantis runewsweeki* (5, 7)

*Gephyromantis* cf. *asper* (6)

*Gephyromantis plicifer* (4)

*Gephyromantis redimitus* (8)

*Gephyromantis sculpturatus* (4, 9, 11)

*Gephyromantis tschenki* (2, 3, 4)

*Gephyromantis malagasius* (9)

*Gephyromantis ventrimaculatus* (5, 6)

*Gephyromantis* sp. 8 (9)\*

*Gephyromantis* sp. 9 (3, 5)

*Gephyromantis* sp. 13 (5)\*

*Guibemantis liber* (3, 5)

*Guibemantis pulcher* (5, 7)

*Guibemantis depressiceps* (3)

*Guibemantis timidus* (11)\*

*Guibemantis tornieri* (2, 3)

*Guibemantis* sp. 7 (5, 7)

*Guibemantis* sp. 12 (3)

*Mantella baroni* (5, 6, 7, 8)

*Mantella bernhardi* (9)\*

*Mantella madagascariensis* (5, 6)

*Mantidactylus argenteus* (8)

*Mantidactylus alutus* (6)

*Mantidactylus betsileanus* (3)

*Mantidactylus femoralis* (6)

*Mantidactylus majori* (2, 4, 5, 7)

*Mantidactylus melanopleura* (5, 7)

*Mantidactylus delormei* (7)

*Mantidactylus opiparis* (5)

*Mantidactylus grandidieri* (4, 5, 8, 9)

*Mantidactylus* cf. *lugubris* (1, 2, 4, 7, 10, 11)

*Mantidactylus* sp. 1 (4)

*Mantidactylus* sp. 13 (10)

*Mantidactylus* sp. 24 (2)

*Mantidactylus* sp. 28 (7)

*Mantidactylus* sp. 44 (9)

*Mantidactylus* sp. 47 (2)

*Mantidactylus* sp. 58

*Mantidactylus* sp. 59

*Spinomantis aglavei* (5)

*Spinomantis elegans* (7)

*Spinomantis peraccae* (7)

*Spinomantis fimbriatus* (2, 5)

*Spinomantis* sp. 7 (7)

*Spinomantis* sp. 8 (7)

**(2) Mantadia/Analamazoatra National Park and nearby forests** (94 species of which 10 CCS and UCS)

Analamazoatra Special Reserve and Mantadia National Park form a complex of protected areas together with several other sites of which we here also include Vohidrazana, Torotorofotsy and An'Ala. The amphibian diversity around Andasibe is exceptional considering that the surveyed sites all are within a similar elevational zone (ca. 800-1100 m), with a maximum distance between collecting sites of 20 km.

- (1) Andasibe village, 18°56'S,48°25'E.
- (2) Analamazoatra, 18°56'S,48°25'E.
- (3) Analamazoatra Reserve entrance and Feon'ny Ala hotel surroundings, ca. 18°56'S,48°25'E
- (4) Analamazoatra - Andasibe water supply dam, ca. ca. 18°56'S,48°25'E
- (5) Mantadia, 18°48'54"S,48°28'32"E.
- (6) Torotorofotsy, 18°52'29"S,48°22'E.
- (7) Vohidrazana and Ambavaniasy village, 18°57'58"S,48°30'E.
- (8) An'Ala, 18°56'S,48°28'E.

Family Ptychadenidae

*Ptychadena mascareniensis* (1, 2, 6, 7)

Family Hyperoliidae

*Heterixalus betsileo* (3)

*Heterixalus madagascariensis* (7)

*Heterixalus punctatus* (3)

Family Microhylidae

*Anodonthyla boulengeri* (2, 8)

*Platypelis barbouri* (2, 8)

*Platypelis grandis* (2, 8)

*Platypelis pollicaris* (2)

*Platypelis tuberifera* (8)

*Plethodontohyla alluaudi* (2, 6)

*Plethodontohyla inguinalis* (8)

*Plethodontohyla mihanika* (2, 3)

*Plethodontohyla notosticta* (2)

*Stumpffia* sp. 8 (2)

*Stumpffia* sp. 6 (2)

*Paradoxophyla palmata* (2, 4)

*Scaphiophryne marmorata* (2)

*Scaphiophryne spinosa* (8)

Family Mantellidae

*Aglyptodactylus madagascariensis* (2)

*Boophis albilabris* (2)  
*Boophis albipunctatus* (2)  
*Boophis boehmei* (2, 4)  
*Boophis bottae* (2, 3)  
*Boophis burgeri* (4)  
*Boophis elenae* (8)  
*Boophis feonnyala* (3)  
*Boophis goudoti* (3, 4)  
*Boophis guibei* (3, 4)  
*Boophis idae* (3, 6)  
*Boophis liami* (7)  
*Boophis lichenoides* (8)  
*Boophis luteus* (1, 2, 3, 4, 5, 6, 7, 8)  
*Boophis madagascariensis* (2, 6, 8)  
*Boophis marojezensis* (7, 8)  
*Boophis pauliani* (3)  
*Boophis picturatus* (2, 8)  
*Boophis pyrrhus* (3, 8)  
*Boophis rappiodes* (3)  
*Boophis reticulatus* (8)  
*Boophis rufioculis* (8)  
*Boophis sibilans* (4)  
*Boophis solomaso* (7)  
*Boophis tasymena* (3)  
*Boophis tephraeomystax* (1, 3, 7)  
*Boophis viridis* (3)  
*Boophis* sp. 2 (7)  
*Boophis* sp. 17 (8)  
*Boophis* sp. 36 (3, 8)

*Blommersia blommersae* (2, 3)  
*Blommersia domerguei* (6)  
*Blommersia grandisonae* (2, 8)  
*Blommersia sarotra* (1, 3)

*Gephyromantis asper* (8)  
*Gephyromantis boulengeri* (2)  
*Gephyromantis cornutus* (2, 4)  
*Gephyromantis eiselti* (2, 7)  
*Gephyromantis moseri* (2, 4)  
*Gephyromantis redimitus* (7, 8)  
*Gephyromantis sculpturatus* (2, 8)  
*Gephyromantis thelenae* (5)  
*Gephyromantis ventrimaculatus* (2)  
*Gephyromantis* sp. 13 (4)

*Guibemantis depressiceps* (3)

*Guibemantis flavobrunneus* (2)  
*Guibemantis kathrinae* (8)  
*Guibemantis liber* (2, 3)  
*Guibemantis pulcher* (2)  
*Guibemantis tornieri* (3)  
*Guibemantis* sp. 3 (2)

*Mantella aurantiaca* (6)  
*Mantella baroni* (5, 7)  
*Mantella crocea* (6)  
*Mantella pulchra* (8)

*Mantidactylus aerumnalis* (8)  
*Mantidactylus albofrenatus* (2)  
*Mantidactylus argenteus* (5, 8)  
*Mantidactylus betsileanus* (2, 3)  
*Mantidactylus cowanii* (5)  
*Mantidactylus femoralis* (2, 8)  
*Mantidactylus grandidieri* (2, 7, 8)  
*Mantidactylus lugubris* (2, 5, 7)  
*Mantidactylus melanopleura* (2, 5, 8)  
*Mantidactylus mocquardi* (2, 4)  
*Mantidactylus opiparis* (2, 8)  
*Mantidactylus* cf. *tricinctus*  
*Mantidactylus zipperi* (8)  
*Mantidactylus zolitschka* (8)  
*Mantidactylus* sp. 28 (8)  
*Mantidactylus* sp. 34 (7)  
*Mantidactylus* sp. 23 (2)

*Spinomantis aglavei* (2, 4, 8)  
*Spinomantis fimbriatus* (4)  
*Spinomantis peraccae* (8)  
*Spinomantis phantasticus* (4)

## Supplementary Information S1.

### Extended methods on DNA sequencing and analysis.

A fragment of the mitochondrial 16S rRNA gene was amplified and sequenced using primers 16SraL and 16SrbH using standard procedures (1). Altogether, ca. 1700 adult specimens and 1150 tadpoles of Malagasy frogs were sequenced in 2000-2007. We used the FFT-NS-2 algorithm in the software MAFFT v. 6.624 (2) for a multiple alignment of these sequences, and manually verified the resulting alignment. Based on Neighbor-joining trees obtained with PAUP\* (3) we identified sequences showing high divergences from reference specimens of described species. Selected sequences were used to compute a tree using Bayesian inference (4) after determining the appropriate substitution model (5). This tree (see below), largely agrees with published phylogenetic knowledge, although a few well-established clades are not recovered due to the limited phylogenetic information in the short gene fragment. Phylogeographic analyses of three complexes of deep genealogical lineages (*Boophis majori* / *B. sp. 35*, *B. luteus*, *Guibemantis liber*; Fig. 2) were computed using the same general methods.

While we use the tree based on the MAFFT alignment to show the distribution of undescribed diversity across major clades, possible alignment artefacts in the distribution of indels in this non-coding DNA fragment can affect the computation of pairwise distances between sequences. To avoid this problem we used the software TaxI (6) to compute uncorrected pairwise distances between all species pairs of Malagasy frogs. This software first aligns each possible pair of sequences and then calculates the number of differences between them, not counting positions with indels. From the distance matrices obtained, we extracted the shortest distance of each included taxon to the most similar sequence overall, and to the most similar sequence of an already described species.

### Further definitions of categories of Candidate species.

In Microbiology, a *Candidatus* status is regularly ascribed to distinct prokaryotic entities for which more than just a sequence is available but characteristics required for description according to the Bacteriological Code (1990 Revision) are lacking. Although we see the need for standardized terms to refer to such distinct but yet undescribed animal species, we do not propose to recognize candidate species as done by the microbiological community, where an official *Candidatus* list exists. One reason is that the requirements to define and describe a new species are less strict in zoology than in microbiology where minimum standards are defined by official committees.

In our study, when genealogical lineages were not sister to those species that are most similar morphologically or bioacoustically, we used this as additional confirmation for CCS status, which however we primarily determined through a combination of distance- and character-based methods. In this concordance approach, divergent individuals are first identified by distance-based DNA barcoding. If the divergence to described species is above a certain threshold, which will differ among groups of organisms, there is a high probability that the individual belongs to an undescribed species which warrants its inclusion in the UCS category. However, it cannot be emphasized enough that the DNA barcoding approach alone is insufficient to reach



CCS status. The second mandatory step is the search for diagnostic characters in morphology and, especially, in advertisement calls. If the genetically divergent frog individual differs convincingly in such characters, or if slight but consistent differences are detected in sympatry, it is categorized as CCS. If the differences are only slight and it occurs in allopatry, it is to be considered as DCL.

Criteria of reciprocal monophyly of haplotype lineages are extremely useful in species delimitation. To assess monophyly or non-monophyly with statistical support, however, often requires longer DNA sequences than usually become available from DNA barcoding studies, and therefore was used only peripherally in our approach to define candidate species.

### Supplementary references.

1. Vences M, Thomas M, Bonett RM, Vieites DR (2005) Deciphering amphibian diversity through DNA barcoding: chances and challenges. *Phil Trans Roy Soc Lond Ser B* 360:1859–1868.
2. Katoh K, Misawa K, Kuma K, Miyata T (2002) MAFFT: a novel method for rapid multiple sequence alignment based on fast Fourier transform. *Nuc Acid Res* 30:3059–3066.
3. Swofford DL (2002) PAUP\*. *Phylogenetic Analysis Using Parsimony (\* and other methods)*, Version 4b10. Sinauer Associates, Sunderland, Massachusetts.
4. Huelsenbeck JP, Ronquist F (2001) MRBAYES: Bayesian inference of phylogenetic trees. *Bioinf* 17:754–755.
5. Nylander JAA (2004) *MrModeltest v2*. Program distributed by the author. Evolutionary Biology center, Uppsala University.
6. Steinke D, Salzburger W, Vences M, Meyer A (2005) TaxI - A software tool for DNA barcoding using distance methods. *Phil Trans Roy Soc Lond Ser B* 360:1975–1980.
7. Chiari Y, Orozco-terWengel P, Vences M, Vieites DR, Sarovy A, Randrianirina JE, Meyer A, Louis Jr E (2006) Genetic identification of units for conservation in tomato frogs, genus *Dyscophus*. *Conserv. Genet.* 7:473-482.
8. Chiari Y, Vences M, Vieites DR, Rabemananjara F, Bora P, Ramilijaona Ravoahangimalala O, Meyer A (2004) New evidence for parallel evolution of colour patterns in Malagasy poison frogs (*Mantella*). *Mol. Ecol.* 13:3763-3774.
9. Crottini A, Chiari Y, Mercurio V, Meyer A, Vences M, Andreone F (2008) Into the canyons: the phylogeography of the Malagasy frogs *Mantella expectata* and *Scaphiophryne gottlebei* in the arid Isalo Massif, and its significance for conservation (Amphibia: Mantellidae and Microhylidae). *Org. Divers. Evol.* 8:368-377.

10. Rabemananjara FCE, Crottini A, Chiari Y, Andreone F, Glaw F, Duguet R, Bora P, Ravoahangimalala Ramilijaona O, Vences M (2007) Molecular systematics of Malagasy poison frogs in the *Mantella betsileo* and *M. laevigata* species groups. *Zootaxa* 1501:31-44.
11. Rabemananjara FCE, Chiari Y, Ravoahangimalala Ramilijaona O, Vences M (2007) Evidence for recent gene flow between north-eastern and south-eastern Madagascar from a phylogeography of the *Mantella cowani* group. *Front. Zool.* 4:article 1
12. Vieites DR, Chiari Y, Vences M, Andreone F, Rabemananjara F, Bora P, Nieto-Román S, Meyer, A (2006) Mitochondrial evidence for distinct phylogeographic units in the endangered Malagasy poison frog *Mantella bernhardi*. *Mol. Ecol.* 15:1617-1625.
13. Wollenberg KC, Glaw F, Meyer A, Vences M (2007) Molecular phylogeny of Malagasy reed frogs, *Heterixalus*, and the relative performance of bioacoustics and color-patterns for resolving their systematics. *Mol. Phylogenet. Evol.* 45:14-22.
14. Wollenberg KC, Vieites DR, van der Meijden A, Glaw F, Cannatella DC, Vences M (2008) Patterns of endemism and species richness in Malagasy cophyline frogs support a key role of mountainous areas for speciation. *Evolution* 62:1890-1907.
15. Glaw F, Vences M (2007) A Field Guide to the Amphibians and Reptiles of Madagascar. Third Edition. Köln, Vences & Glaw, 496 pp.

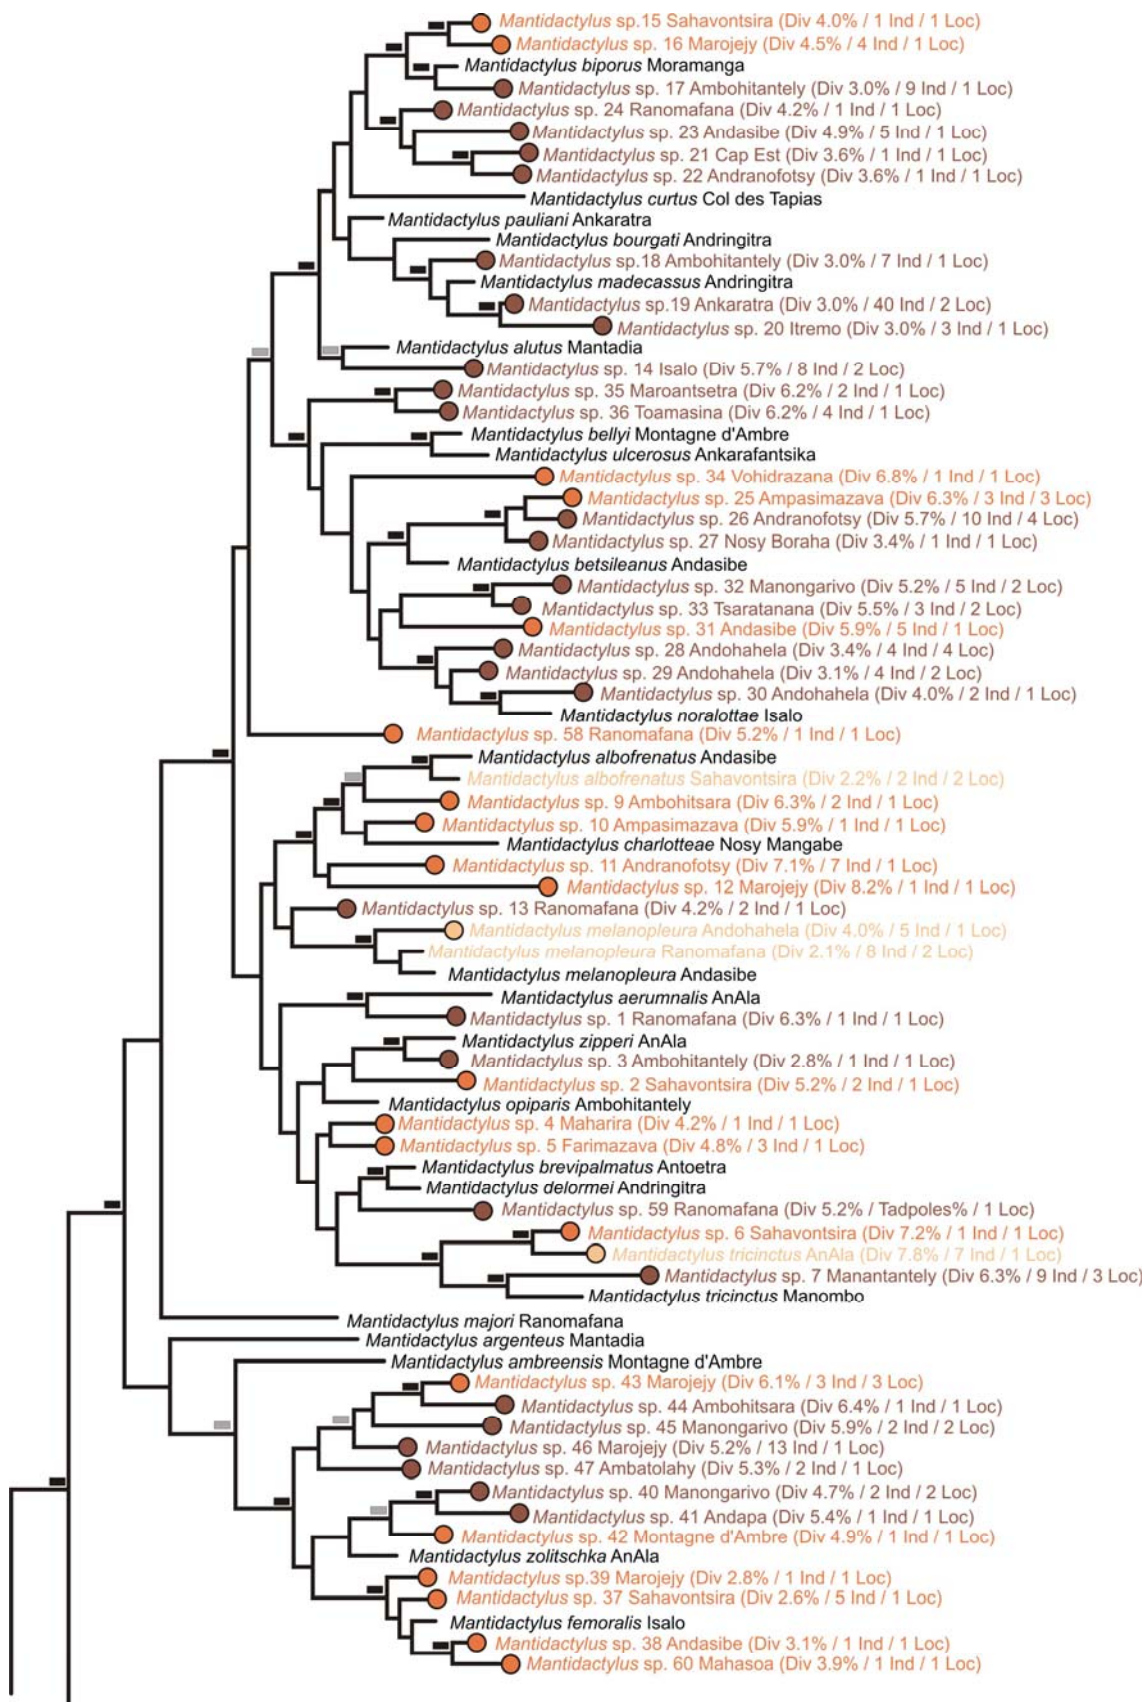

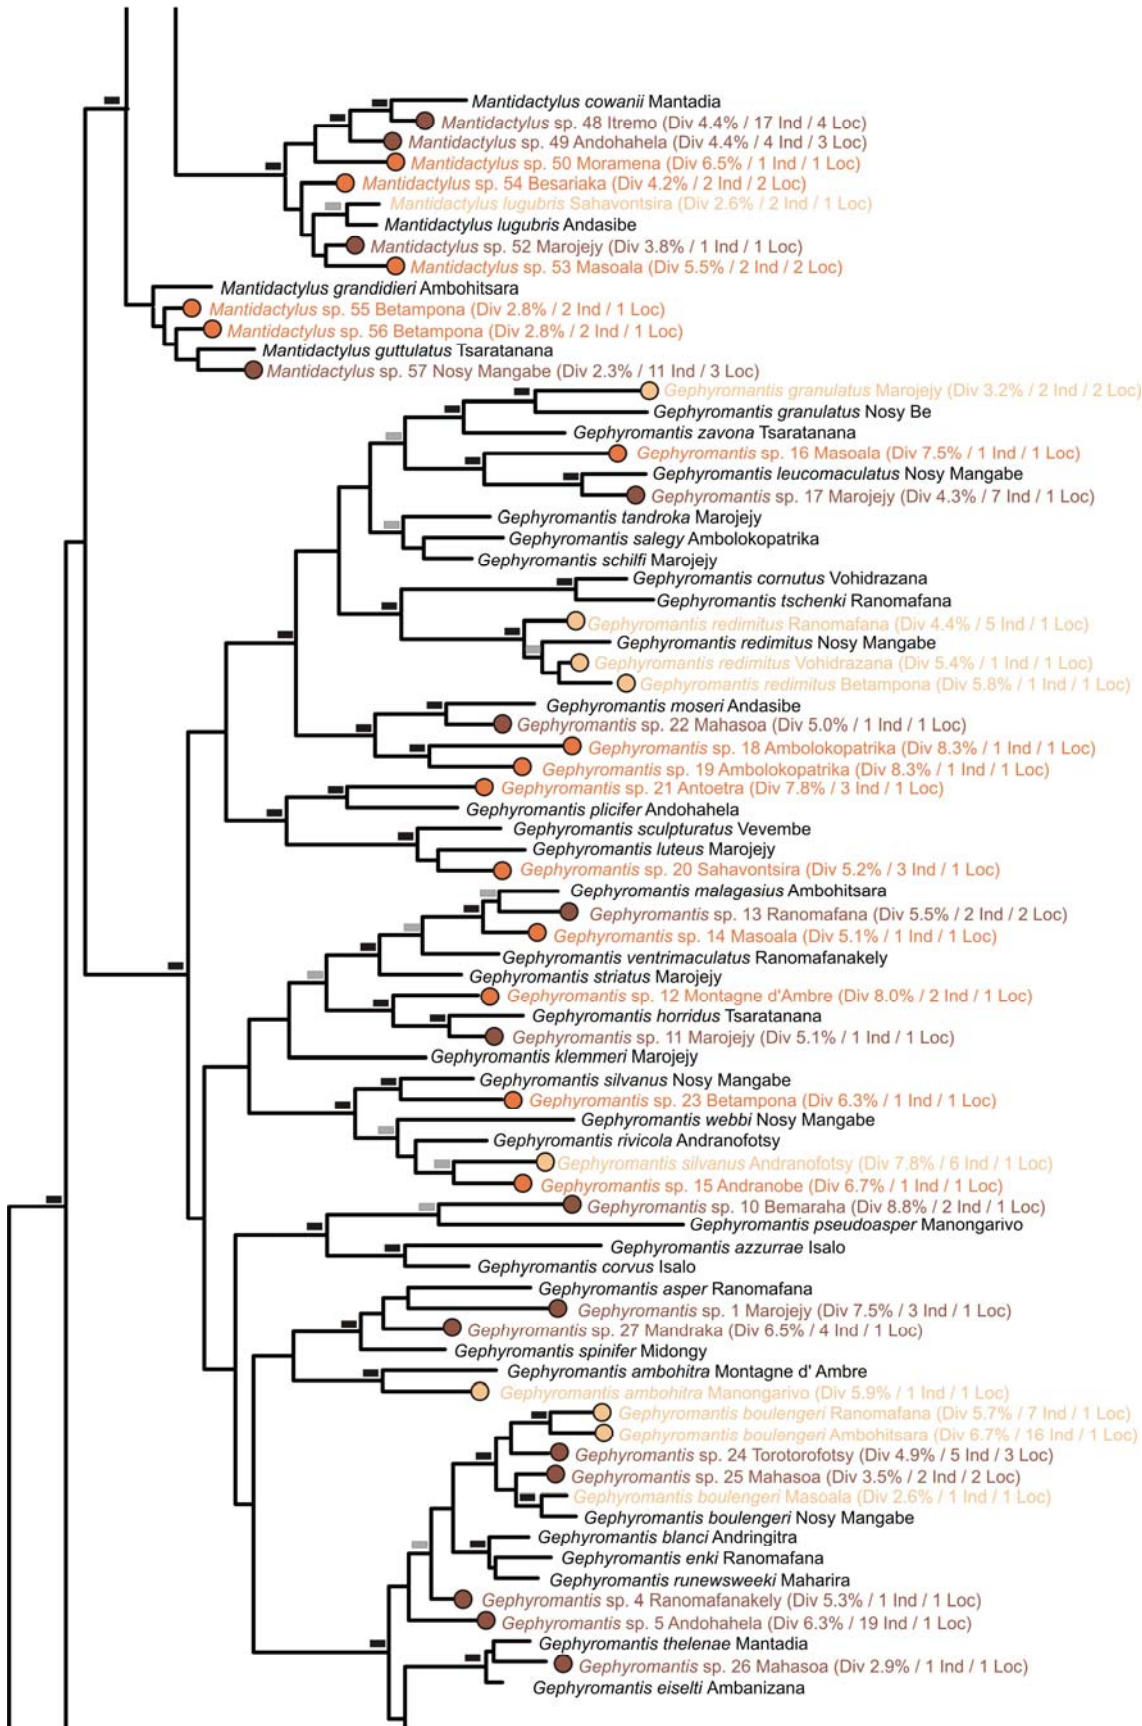

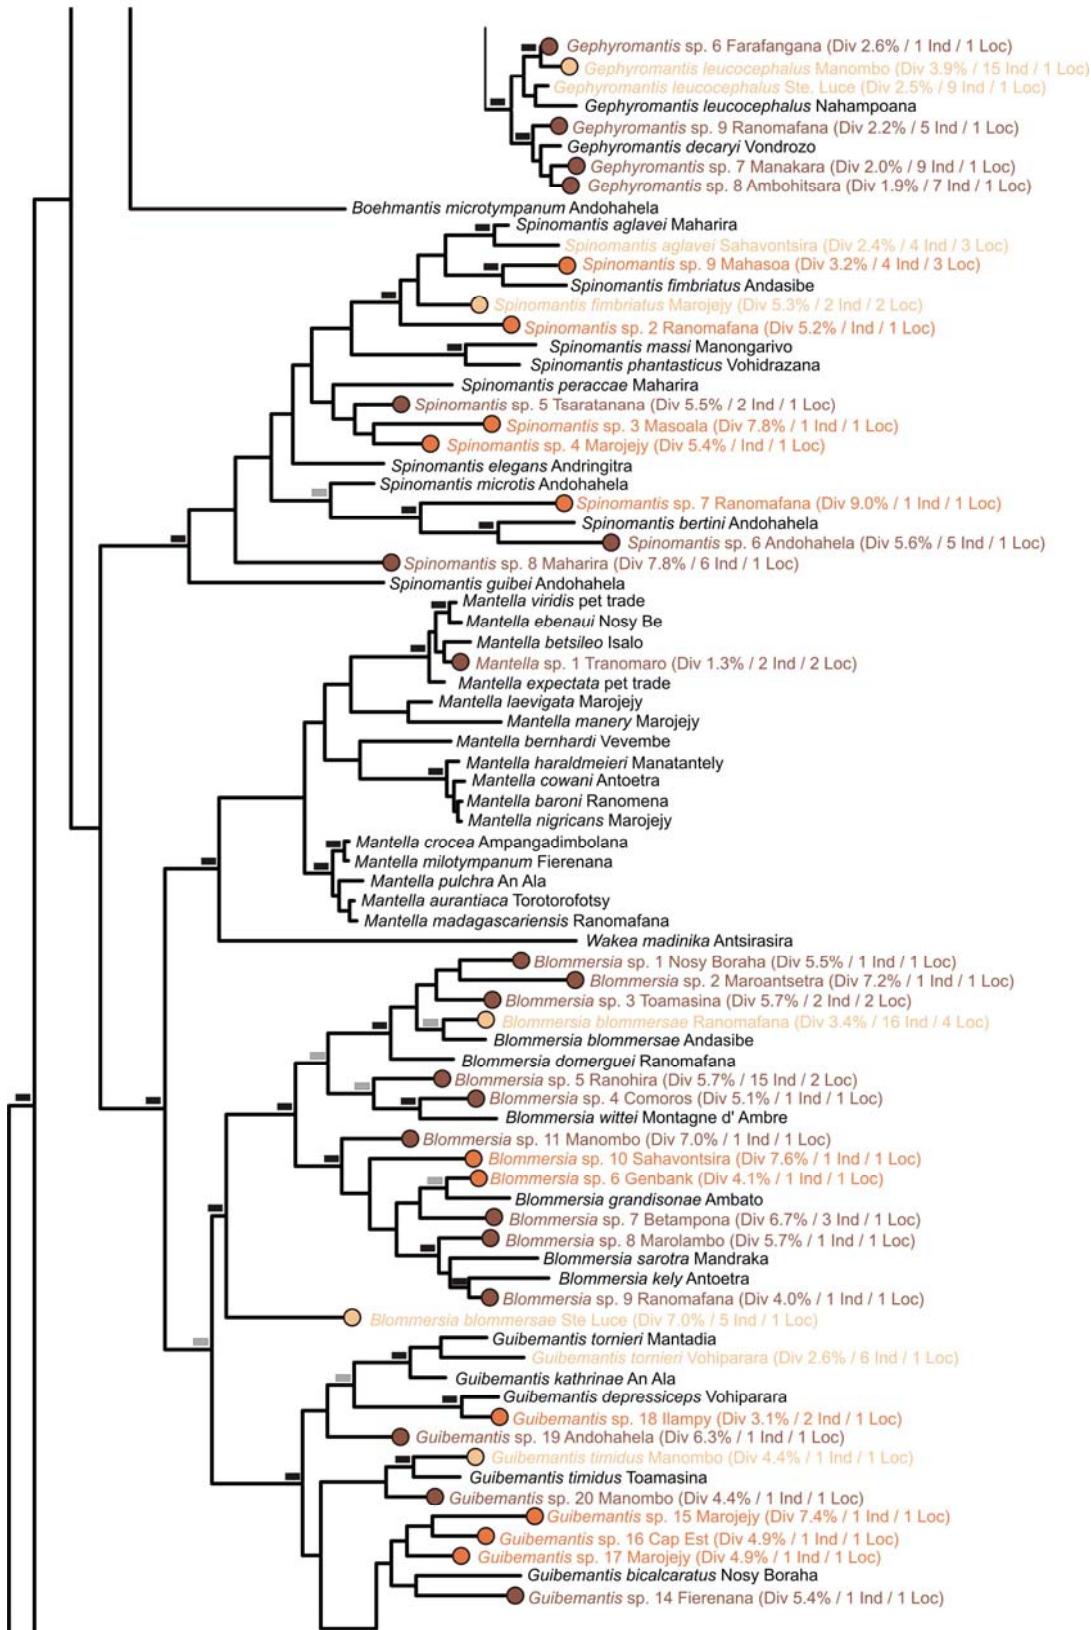

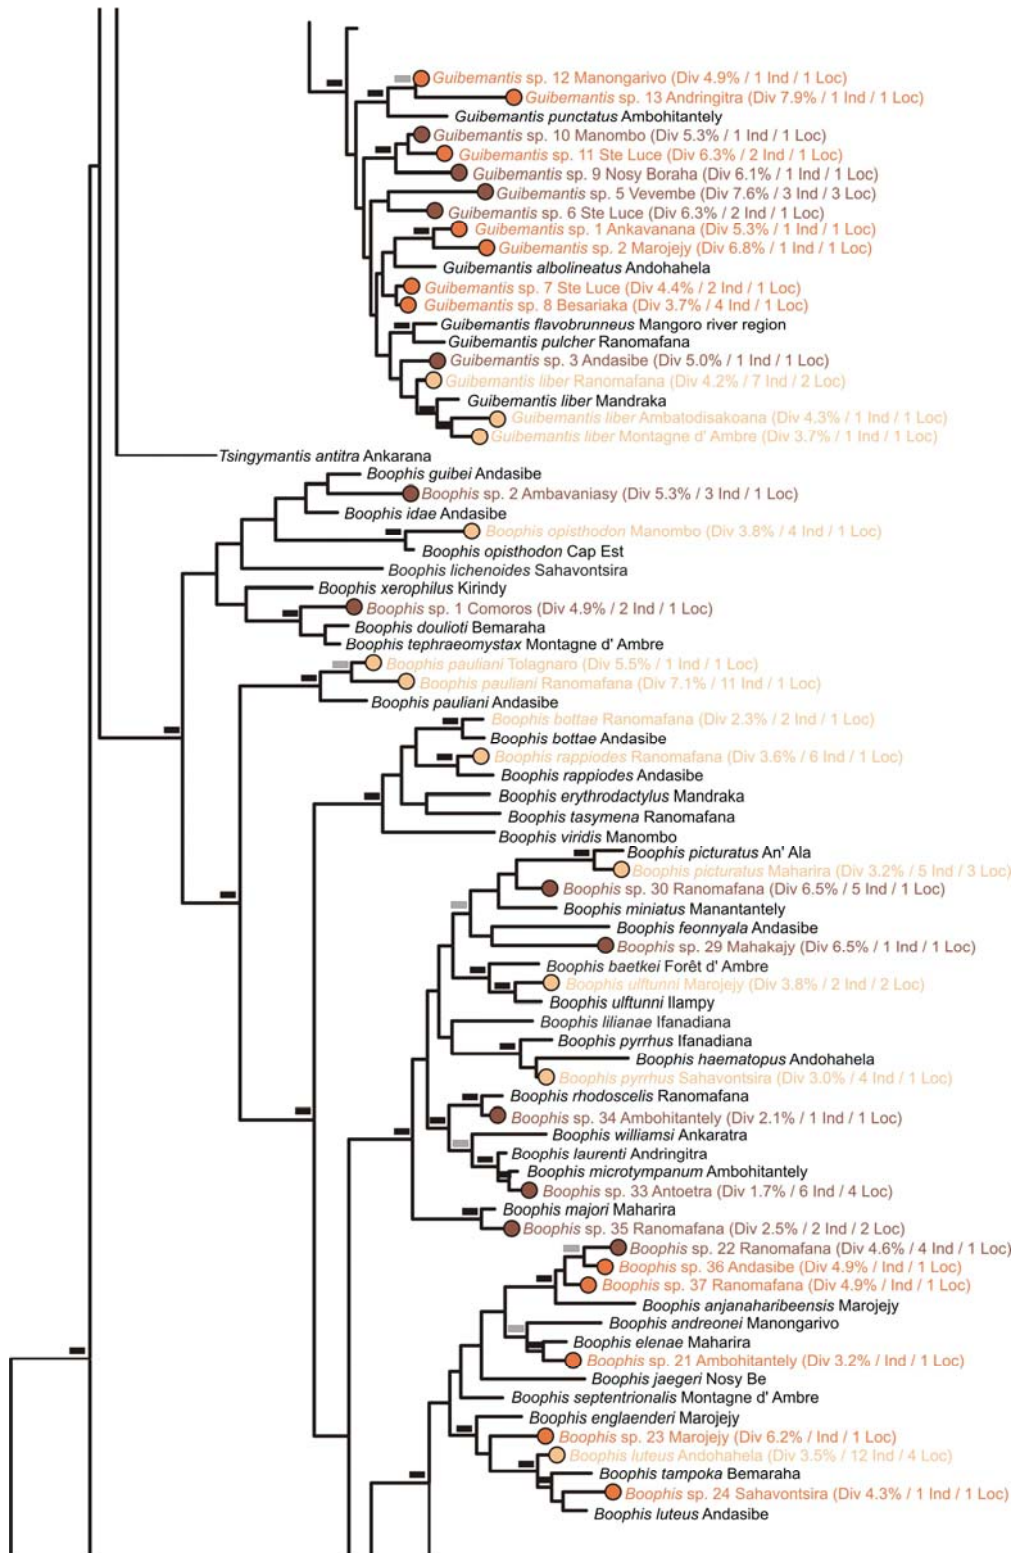

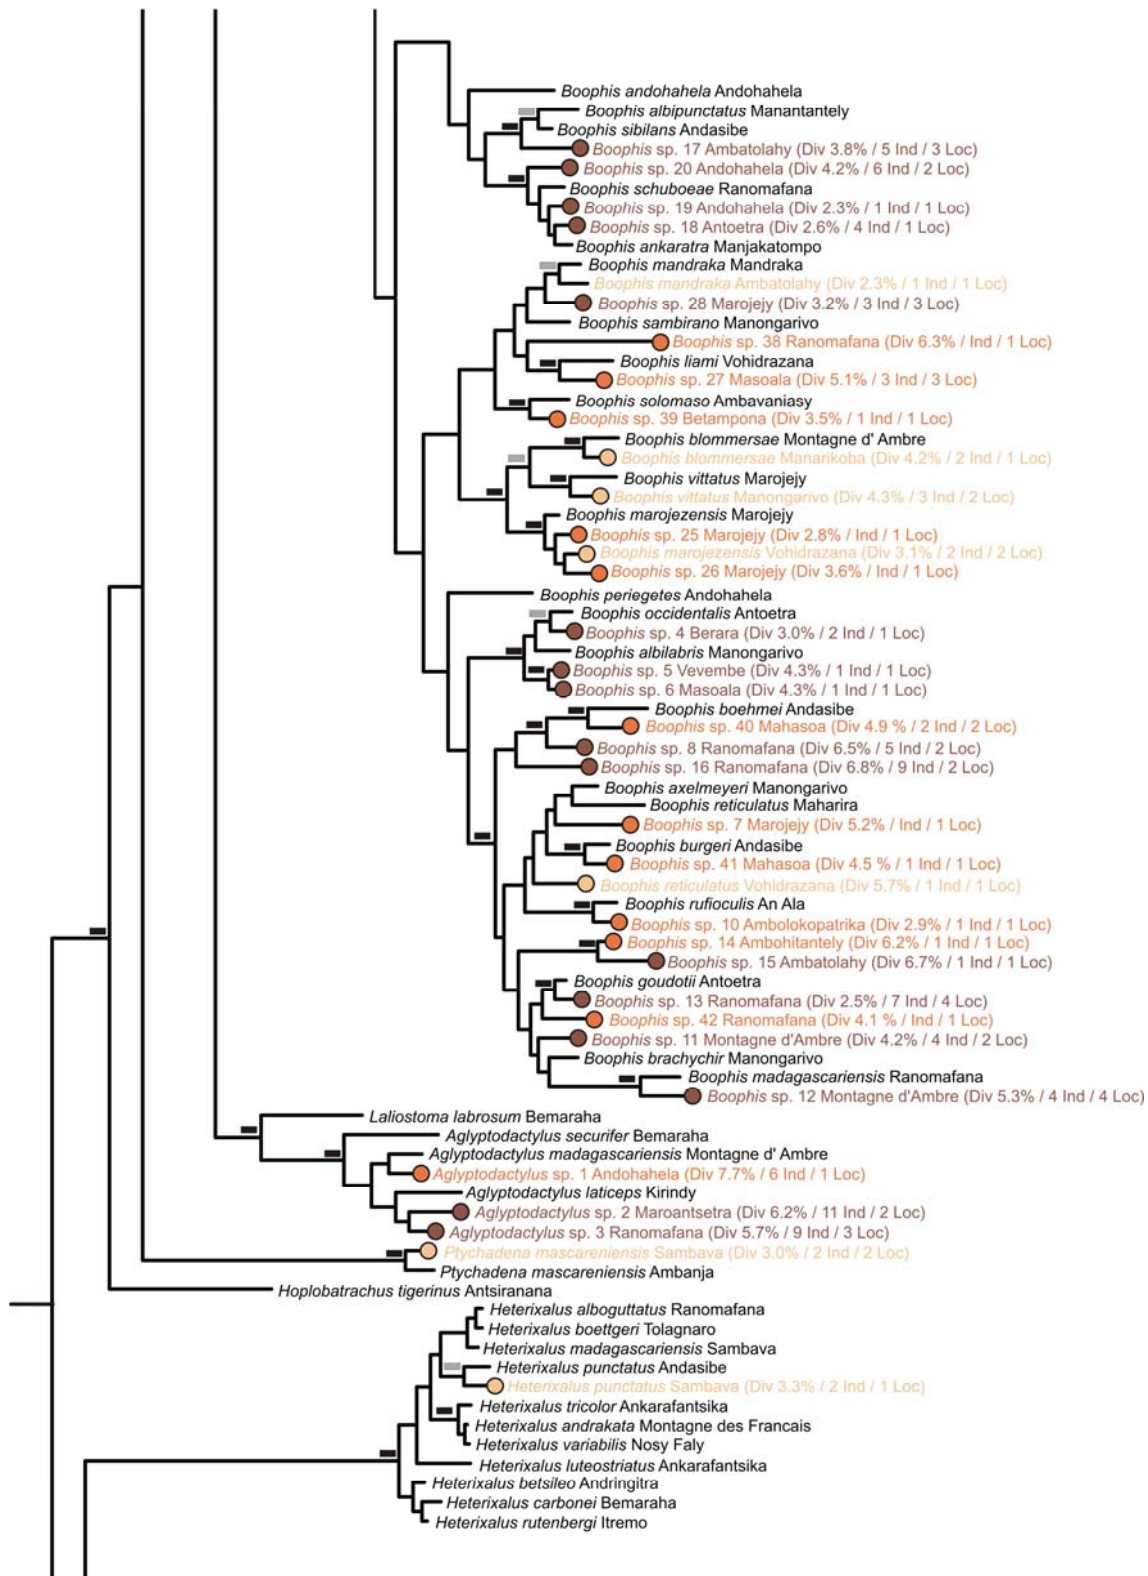

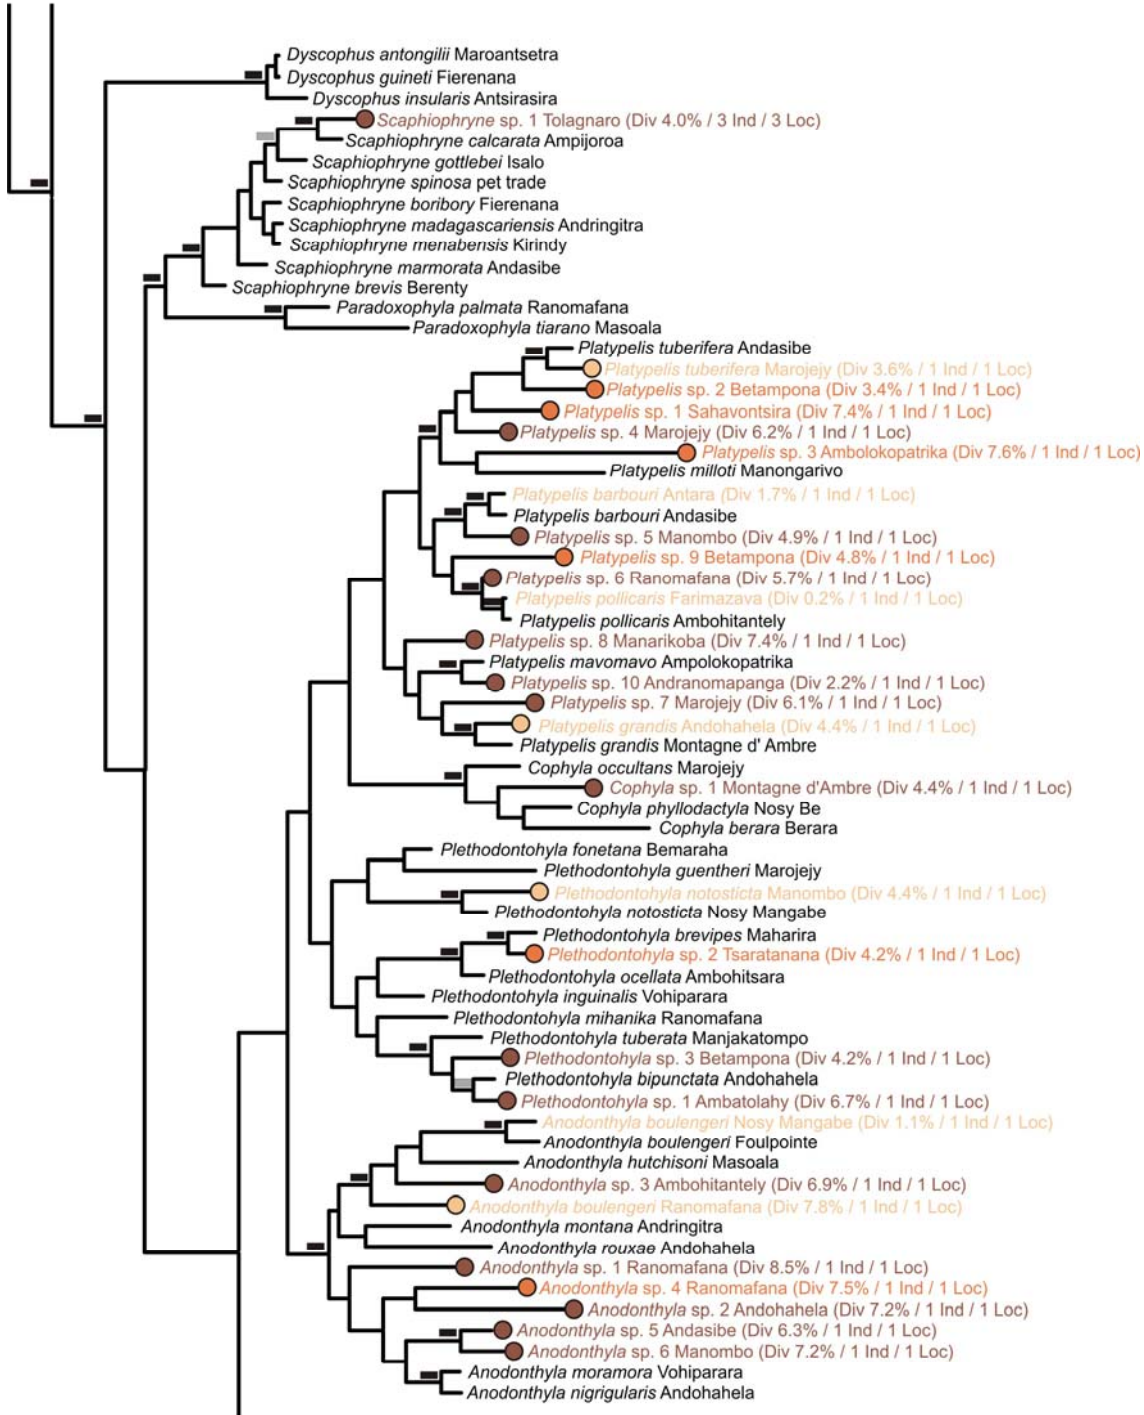



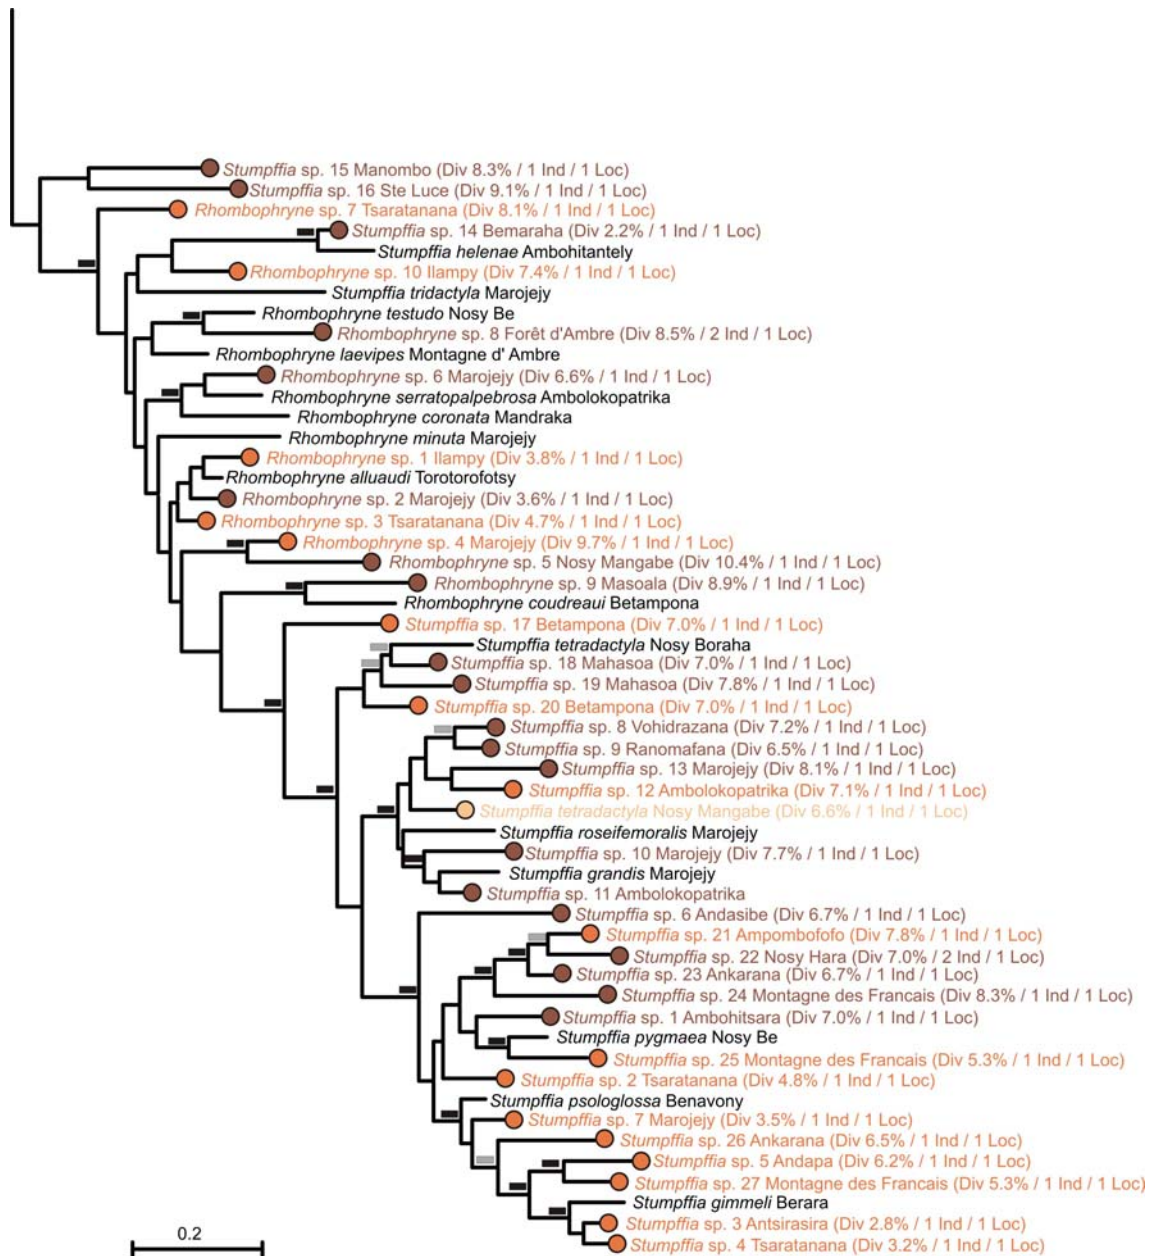

## Supplementary figure 1. Detailed phylogenetic tree of Malagasy amphibians and further information on analysis methods.

The following subtrees are enlarged views of the phylogenetic tree shown in Fig. 1a. Each undescribed lineage is further denoted with collecting locality, and, in parentheses, the lowest genetic divergence (uncorrected p-distance) to the closest described species, and the number of individuals and localities for which 16S rDNA sequences of the new species are available. For many of the confirmed candidate species, more individuals were available for morphological and bioacoustic study but were not sequenced. Also, for many lineages additional sequences from tadpole individuals were analysed but are not listed here. UCS lineages for which only tadpole sequences were available are denoted with "Tad".

For several species (most *Mantella*, *Dyscophus antongilii* and *D. guineti*, *Scaphiophryne gottlebei*, *Guibemantis liber*, and many *Gephyromantis*) large series of samples (up to 150 individuals per species) were studied for phylogeographic analysis; these sequences of a fragment of the cytochrome *b* gene are not listed here. These more detailed analyses, largely published elsewhere or in the process of publication (7-12) were helpful in confirming that (a) the high divergences within and between species and candidate species are reflected also in protein-coding mitochondrial genes and are no alignment artifact of the non-protein-coding 16S rRNA sequences which requires the use of gaps to account for insertions and deletions, and (b) that in some cases, extensive hybridization and admixture can occur in contact zones of deeply divergent haplogroups which thus are correctly defined as DCL. Furthermore, combined analysis of sequences of 16S rDNA, cytochrome *b*, and other genes, provided highly supported phylogenies that were screened to confirm that the 16S tree presented here reflects largely correct phylogenetic relationships: Hyperoliidae (13), Microhylidae (14), Mantellidae.

Taxonomy largely follows AmphibiaWeb ([www.amphibiaweb.org](http://www.amphibiaweb.org)). Following the most recent taxonomic account on Malagasy amphibians (15) we do not consider the following species: *Boophis hillenii* (probably synonym of *B. idae*); *Mantidactylus ambohitombi* (possible synonym of *M. curtus*); *Plethodontohyla angulifera*, *Scaphiophryne obscura* and *Scaphiophryne verrucosa* (historical taxa of unclarified taxonomic status).

Because Malagasy frogs are characterized by 100% endemism, the possibility that newly identified lineages belong to species already described from other countries can be disregarded. The moderate dimensions of the island, together with intensive fieldwork carried out between 1991 and 2007 throughout Madagascar, aided the collection of molecular data for all described species to date, except seven (*Spinomantis brunae*, *S. nussbaumi*, *S. tavaratra*, *Madecassophryne truebae*, *Platypelis alticola*, *P. tsaratananensis*, *P. tetra*, *P. cowani*, *Plethodontohyla guentherpetersi*). Hence, our analyses include virtually the whole described diversity of frogs from Madagascar, plus many other undescribed lineages.

The trees show additional UCS and DCL that differed by less than 3% divergence (not marked with circle symbols, except where phylogeny suggests a distant position from morphologically closest species) and two additional species from the Comoro Island of Mayotte. These were not included in the counts and graphs.

For construction of the tree we first compiled a dataset of all available 16S sequences of Malagasy frogs (2850 terminals) and also considered information from trees based on available cytochrome b sequences (about 1200 sequences). We then compiled a data set containing representatives of all described species, wherever possible originating from their type localities or even from type specimens, plus all deeply divergent lineages. Based on the first NJ tree the assignment of all sequences to genera and subgenera was unambiguous. For calculation of the final tree we constrained a number of nodes that are well-supported from previous studies that included concatenated sequences of various genes: (a) the Microhylidae, (b) the Cophylinae + Scaphiophryninae, (c) the Microhylidae + Hyperoliidae, (d) the Boophinae, (e) the Mantellinae, (f) *Gephyromantis* + *Boehmantis* + *Mantidactylus*, (g) *Wakea* + *Mantella*, (h) *Blommersia* + *Guibemantis*, (i) *Spinomantis* + *Blommersia* + *Guibemantis* + *Wakea* + *Mantella*, (j) the genus *Boophis*, and (k) the subgenus *Chonomantis* in *Mantidactylus*.

| Name as in tree                         | Name as in Glaw & Vences (2007)                                      | Locality of sequenced specimen | Voucher number        | Genbank accession | Bioacoustic divergence      | Morphological and color divergence                                                                                     |
|-----------------------------------------|----------------------------------------------------------------------|--------------------------------|-----------------------|-------------------|-----------------------------|------------------------------------------------------------------------------------------------------------------------|
| <i>Aglyptodactylus laticeps</i>         | <i>Aglyptodactylus laticeps</i>                                      | Kirindy                        | ZSM 199/2003          | AY847959          |                             |                                                                                                                        |
| <i>Aglyptodactylus madagascariensis</i> | <i>Aglyptodactylus madagascariensis</i>                              | Montagne d'Ambre               | ZSM 203/2004          | AY847979          |                             |                                                                                                                        |
| <i>Aglyptodactylus securifer</i>        | <i>Aglyptodactylus securifer</i>                                     | Bemaraha                       | ZSM 14/2006           | FJ559108          |                             |                                                                                                                        |
| <i>Aglyptodactylus</i> sp. 1            | <i>Aglyptodactylus</i> sp. aff. <i>madagascariensis</i> "South"      | Andohahela                     | ZSM 80/2004           | AY847978          |                             |                                                                                                                        |
| <i>Aglyptodactylus</i> sp. 2            | <i>Aglyptodactylus</i> sp. aff. <i>madagascariensis</i> "East"       | Maroantsetra                   | MVTIS 2002A70         | FJ559109          | Not assessed                | Morphological differences (smaller size)                                                                               |
| <i>Aglyptodactylus</i> sp. 3            | <i>Aglyptodactylus</i> sp. aff. <i>madagascariensis</i> "Ranomafana" | Ranomafana                     | ZMA 20259             | AY8487999         | Probably slight differences | Slight morphological differences (smaller size) and sympatric occurrence with <i>A. madagascariensis</i> in Ranomafana |
| <i>Anodonthyla boulengeri</i>           | <i>Anodonthyla boulengeri</i>                                        | Foulpointe                     | ZSM 264/2002          | AY594091          |                             |                                                                                                                        |
| <i>Anodonthyla boulengeri</i>           | <i>Anodonthyla boulengeri</i>                                        | Nosy Mangabe                   | ZCMV 2157             | FJ664183          |                             |                                                                                                                        |
| <i>Anodonthyla boulengeri</i>           | <i>Anodonthyla boulengeri</i>                                        | Ranomafana                     | UADBA (ZCMV 13)       | EU341091          | No obvious call differences | No obvious morphological differences                                                                                   |
| <i>Anodonthyla hutchisoni</i>           | <i>Anodonthyla hutchisoni</i>                                        | Masoala (Ilampy)               | FAZC 10243            | FJ559110          |                             |                                                                                                                        |
| <i>Anodonthyla montana</i>              | <i>Anodonthyla montana</i>                                           | Andringitra                    | UADBA (FGMV 2001.530) | AY594090          |                             |                                                                                                                        |
| <i>Anodonthyla moramora</i>             | <i>Anodonthyla moramora</i>                                          | Ranomafana (Vohiparara)        | ZMA 20050             | EU341090          |                             |                                                                                                                        |
| <i>Anodonthyla nigrigularis</i>         | <i>Anodonthyla nigrigularis</i>                                      | Andohahela                     | UADBA 24748           | EU341085          |                             |                                                                                                                        |
| <i>Anodonthyla rouxae</i>               | <i>Anodonthyla rouxae</i>                                            | Andohahela                     | FGZC 2422             | EU341086          |                             |                                                                                                                        |
| <i>Anodonthyla</i> sp. 1                | <i>Anodonthyla</i> sp. "Ranomafana"                                  | Ranomafana                     | ZCMV 214              | EU341087          | Unique call in the genus    | Larger size and color differences                                                                                      |
| <i>Anodonthyla</i> sp. 2                | <i>Anodonthyla</i> sp. "Andohahela"                                  | Andohahela                     | FGZC 2409             | EU341085          | Call unknown                | Unique combination of small size and distinct though variable color patterns                                           |

|                               |                                                             |                          |                      |          |                                                                                                                         |                                                                              |
|-------------------------------|-------------------------------------------------------------|--------------------------|----------------------|----------|-------------------------------------------------------------------------------------------------------------------------|------------------------------------------------------------------------------|
| <i>Anodonthyla</i> sp. 3      | <i>Anodonthyla</i> sp. "Ambohitantely"                      | Ambohitantely            | FGZC 2102            | EU341092 | Call similar to <i>A. nigrigularis</i> but genetically unrelated to that species                                        | Superficially similar to <i>A. nigrigularis</i>                              |
| <i>Anodonthyla</i> sp. 4      | Not included                                                | Ranomafana               | ZCMV 204             | FJ559111 |                                                                                                                         |                                                                              |
| <i>Anodonthyla</i> sp. 5      | <i>Anodonthyla boulengeri</i>                               | Andasibe                 | ZCMV 2207            | FJ559112 | Call similar to <i>A. boulengeri</i>                                                                                    | Distinctly smaller size                                                      |
| <i>Anodonthyla</i> sp. 6      | Not included                                                | Manombo                  | ZCMV 5454            | FJ559113 | Call similar to <i>A. nigrigularis</i> but genetically unrelated to that species                                        | Not assessed                                                                 |
| <i>Blommersia blommersae</i>  | <i>Blommersia blommersae</i>                                | Andasibe                 | UADBA (FGMV 2000.65) | DQ235418 |                                                                                                                         |                                                                              |
| <i>Blommersia blommersae</i>  | <i>Blommersia blommersae</i>                                | Ranomafana               | UADBA 21132          | AY848047 |                                                                                                                         |                                                                              |
| <i>Blommersia blommersae</i>  | <i>Blommersia blommersae</i>                                | Ste Luce                 | ---                  | FJ559114 |                                                                                                                         |                                                                              |
| <i>Blommersia domerguei</i>   | <i>Blommersia domerguei</i>                                 | Ranomafana (Ambatovory)  | ZMA 20056            | AY848071 |                                                                                                                         |                                                                              |
| <i>Blommersia grandisonae</i> | <i>Blommersia grandisonae</i>                               | Ambato                   | ZFMK 66669           | FJ559115 |                                                                                                                         |                                                                              |
| <i>Blommersia kely</i>        | <i>Blommersia kely</i>                                      | Antoetra                 | ZMA 19551            | AY848078 |                                                                                                                         |                                                                              |
| <i>Blommersia sarotra</i>     | <i>Blommersia sarotra</i>                                   | Mandraka                 | ZSM 354/2000         | AF317687 |                                                                                                                         |                                                                              |
| <i>Blommersia</i> sp. 1       | <i>Blommersia</i> sp. aff. <i>blommersae</i> "Nosy Boraha"  | Nosy Boraha              | ZCMV 3232            | FJ559116 | Unique call in the genus                                                                                                | Slight differences in webbing                                                |
| <i>Blommersia</i> sp. 2       | <i>Blommersia</i> sp. aff. <i>blommersae</i> "Maroantsetra" | Maroantsetra             | MVTIS 2002A10        | AY848104 | Quantitative call differences to other species                                                                          | Slight differences in webbing                                                |
| <i>Blommersia</i> sp. 3       | <i>Blommersia</i> sp. aff. <i>blommersae</i> "Toamasina"    | Toamasina                | ZCMV 3233            | FJ559117 | Quantitative call differences to other species                                                                          | Unique morphology of femoral glands                                          |
| <i>Blommersia</i> sp. 4       | Not included                                                | Mayotte (Comoro Islands) | ZSM 652/2000         | AY341639 | Qualitative call differences to other species                                                                           | Unique morphology in the genus                                               |
| <i>Blommersia</i> sp. 5       | <i>Blommersia</i> sp. aff. <i>wittei</i> "Isalo"            | Ranohira                 | ZSM 22/2004          | AY848031 | Call similar to some populations of <i>B. wittei</i> but slight quantitative differences to geographically closest ones | Not assessed, but apparently smaller average body size than <i>B. wittei</i> |
| <i>Blommersia</i> sp. 6       | Not included                                                | Genbank sequence         | UMMZ 212950          | AY454384 | Unknown                                                                                                                 | Unknown                                                                      |

|                                  |                                                           |                          |                             |          |                                  |                                                                                                                                                                                                                                                                                      |
|----------------------------------|-----------------------------------------------------------|--------------------------|-----------------------------|----------|----------------------------------|--------------------------------------------------------------------------------------------------------------------------------------------------------------------------------------------------------------------------------------------------------------------------------------|
| <i>Blommersia</i> sp. 7          | Not included                                              | Betampona                | MVTIS AC805 /<br>FAZC 13613 | FJ559118 | Unknown                          | Strong differences in color, extreme differences in reproductive biology<br>Unique morphology and color<br>Intermediate between <i>B. sarotra</i> and <i>B. kely</i><br>Unknown<br>Color pattern different from <i>B. grandisonae</i> which in turn is uniform throughout Madagascar |
| <i>Blommersia</i> sp. 8          | <i>Blommersia</i> sp. aff. <i>grandisonae</i> "Marolambo" | Marolambo                | ZSM 54/2002                 | AY848098 | Unknown                          |                                                                                                                                                                                                                                                                                      |
| <i>Blommersia</i> sp. 9          | <i>Blommersia</i> sp. aff. <i>sarotra</i> "Ranomafana"    | Ranomafana (Vohiparara)  | MVTIS 2002A7                | AY848023 | Similar to <i>B. sarotra</i>     |                                                                                                                                                                                                                                                                                      |
| <i>Blommersia</i> sp. 10         | Not included                                              | Sahavontsira             | MVTIS AC506 /<br>FAZC 5672  | FJ559119 | Unknown                          |                                                                                                                                                                                                                                                                                      |
| <i>Blommersia</i> sp. 11         | <i>Blommersia</i> sp. aff. <i>grandisonae</i>             | Manombo                  | ZCMV 5432                   | FJ559120 | Similar to <i>B. grandisonae</i> |                                                                                                                                                                                                                                                                                      |
| <i>Blommersia wittei</i>         | <i>Blommersia wittei</i>                                  | Montagne d'Ambre         | ZSM 879/2003                | AY848105 |                                  |                                                                                                                                                                                                                                                                                      |
| <i>Boehmantis microtympanum</i>  | <i>Boehmantis microtympanum</i>                           | Andohahela               | ZSM 79/2004                 | AY848203 |                                  |                                                                                                                                                                                                                                                                                      |
| <i>Boophis albilabris</i>        | <i>Boophis albilabris</i>                                 | Manongarivo              | UADBA<br>(FGMV 2002.807)    | AY848556 |                                  |                                                                                                                                                                                                                                                                                      |
| <i>Boophis albipunctatus</i>     | <i>Boophis albipunctatus</i>                              | Manantantely             | ZSM 157/2004                | AY848446 |                                  |                                                                                                                                                                                                                                                                                      |
| <i>Boophis andohahela</i>        | <i>Boophis andohahela</i>                                 | Andohahela               | FGZC 2372                   | FJ559121 |                                  |                                                                                                                                                                                                                                                                                      |
| <i>Boophis andreonei</i>         | <i>Boophis andreonei</i>                                  | Manongarivo              | ZMA<br>(FGMV 2002.806)      | AY848449 |                                  |                                                                                                                                                                                                                                                                                      |
| <i>Boophis anjanaharibeensis</i> | <i>Boophis anjanaharibeensis</i>                          | Marojejy                 | FGZC 2762                   | FJ559122 |                                  |                                                                                                                                                                                                                                                                                      |
| <i>Boophis ankaratra</i>         | <i>Boophis ankaratra</i>                                  | Manjakatomp              | ZSM 367/2000                | AJ315911 |                                  |                                                                                                                                                                                                                                                                                      |
| <i>Boophis axelmeyeri</i>        | <i>Boophis axelmeyeri</i>                                 | Manongarivo              | UADBA<br>(FGMV 2002.809)    | DQ118668 |                                  |                                                                                                                                                                                                                                                                                      |
| <i>Boophis baetkei</i>           | <i>Boophis</i> sp. aff. <i>rappiodes</i>                  | Forêt d'Ambre            | ZSM (FGZC 1391)             | EU314954 |                                  |                                                                                                                                                                                                                                                                                      |
| <i>Boophis blommersae</i>        | <i>Boophis blommersae</i>                                 | Montagne d'Ambre         | ZSM 906/2003                | AY883982 |                                  |                                                                                                                                                                                                                                                                                      |
| <i>Boophis blommersae</i>        | <i>Boophis blommersae</i>                                 | Manarikoba (Tsaratanana) | ZSM 617/2001                | AY883981 | No obvious call differences      | No obvious morphological differences                                                                                                                                                                                                                                                 |
| <i>Boophis boehmei</i>           | <i>Boophis boehmei</i>                                    | Andasibe                 | UADBA<br>(FGMV 2001.1205)   | AY848559 |                                  |                                                                                                                                                                                                                                                                                      |
| <i>Boophis bottae</i>            | <i>Boophis bottae</i>                                     | Andasibe                 | ZSM 344/2000                | AJ314817 |                                  |                                                                                                                                                                                                                                                                                      |
| <i>Boophis bottae</i>            | <i>Boophis bottae</i>                                     | Ranomafana               | UADBA 24332                 | AY848626 |                                  |                                                                                                                                                                                                                                                                                      |

|                                 |                                                      |                       |                           |          |                                          |                                 |
|---------------------------------|------------------------------------------------------|-----------------------|---------------------------|----------|------------------------------------------|---------------------------------|
| <i>Boophis brachychir</i>       | <i>Boophis</i> sp. aff. <i>brachychir</i>            | Manongarivo           | UADBA<br>(FGMV 2002.702)  | AY848538 |                                          |                                 |
| <i>Boophis burgeri</i>          | <i>Boophis burgeri</i>                               | Andasibe              | UADBA<br>(FGMV 2001.1246) | AY848566 |                                          |                                 |
| <i>Boophis doulioti</i>         | <i>Boophis doulioti</i>                              | Bemaraha              | ZSM 29/2006               | FJ559123 |                                          |                                 |
| <i>Boophis elenae</i>           | <i>Boophis elenae</i>                                | Ranomafana (Maharira) | UADBA 24141               | AY848470 |                                          |                                 |
| <i>Boophis englaenderi</i>      | <i>Boophis englaenderi</i>                           | Marojejy              | ZCMV 856                  | FJ559124 |                                          |                                 |
| <i>Boophis erythrodactylus</i>  | <i>Boophis erythrodactylus</i>                       | Mandraka              | ZSM 344/2000              | AJ314814 |                                          |                                 |
| <i>Boophis feonnyala</i>        | <i>Boophis feonnyala</i>                             | Andasibe              | ZSM 313/2000              | AJ315922 |                                          |                                 |
| <i>Boophis goudotii</i>         | <i>Boophis goudotii</i>                              | Antoetra              | ZMA 19544                 | AY848570 |                                          |                                 |
| <i>Boophis guibei</i>           | <i>Boophis guibei</i>                                | Andasibe              | ZSM 348/2000              | DQ116467 |                                          |                                 |
| <i>Boophis haematopus</i>       | <i>Boophis haematopus</i>                            | Andohahela            | ZSM 120/2004              | AY848633 |                                          |                                 |
| <i>Boophis idae</i>             | <i>Boophis idae</i>                                  | Andasibe              | ZSM 45/2002               | AY848481 |                                          |                                 |
| <i>Boophis jaegeri</i>          | <i>Boophis jaegeri</i>                               | Nosy Be               | ZSM 587/2001              | FJ559125 |                                          |                                 |
| <i>Boophis laurenti</i>         | <i>Boophis laurenti</i>                              | Andringitra           | ZSM 727/2001              | AY848575 |                                          |                                 |
| <i>Boophis liami</i>            | <i>Boophis liami</i>                                 | Vohidrazana           | ZSM 310/2000              | AJ315921 |                                          |                                 |
| <i>Boophis lichenoides</i>      | <i>Boophis lichenoides</i>                           | Sahavontsira          | FAZC 5679                 | FJ664184 |                                          |                                 |
| <i>Boophis lilianae</i>         | <i>Boophis</i> sp. aff. <i>rappiodes</i> "South"     | Ifanadiana            | ZCMV 2864                 | EU314953 |                                          |                                 |
| <i>Boophis luteus</i>           | <i>Boophis luteus</i>                                | Andasibe              | UADBA<br>(FGMV 2000.063)  | AJ315916 |                                          |                                 |
| <i>Boophis luteus</i>           | <i>Boophis luteus</i>                                | Andohahela            | ZSM 128/2004              | AY848485 | Possible qualitative<br>call differences | No morphological<br>differences |
| <i>Boophis madagascariensis</i> | <i>Boophis madagascariensis</i>                      | Ranomafana            | ZMA (ZCMV 344)            | AY848585 |                                          |                                 |
| <i>Boophis majori</i>           | <i>Boophis majori</i>                                | Ranomafana (Maharira) | ZMA 20068                 | AY848586 |                                          |                                 |
| <i>Boophis mandraka</i>         | <i>Boophis mandraka</i>                              | Mandraka              | ZSM 346/2000              | AJ315921 |                                          |                                 |
| <i>Boophis mandraka</i>         | <i>Boophis</i> sp. aff. <i>mandraka</i> "Ranomafana" | Ambatolahy            | ZCMV 5332                 | FJ559126 |                                          |                                 |
| <i>Boophis marojezensis</i>     | <i>Boophis marojezensis</i>                          | Marojejy              | FGZC 2857                 | FJ559127 |                                          |                                 |
| <i>Boophis marojezensis</i>     | <i>Boophis marojezensis</i>                          | Vohidrazana           | ZSM 326/2000              | FJ559128 | No obvious call<br>differences           | No morphological<br>differences |
| <i>Boophis microtympanum</i>    | <i>Boophis microtympanum</i>                         | Ambohitantely         | FGZC 2200                 | FJ559129 |                                          |                                 |
| <i>Boophis miniatus</i>         | <i>Boophis miniatus</i>                              | Manantantely          | ZSM 142/2004              | AY848639 |                                          |                                 |

|                                |                                |                                          |                  |          |                             |                                                          |
|--------------------------------|--------------------------------|------------------------------------------|------------------|----------|-----------------------------|----------------------------------------------------------|
| <i>Boophis occidentalis</i>    | <i>Boophis occidentalis</i>    | Near Antoetra? -<br>unconfirmed locality | ZSM 44/2002      | AY341677 |                             |                                                          |
| <i>Boophis opisthodon</i>      | <i>Boophis opisthodon</i>      | Cap Est                                  | ZFMK 70480       | AF215331 |                             |                                                          |
| <i>Boophis opisthodon</i>      | <i>Boophis opisthodon</i>      | Manombo                                  | ZMA 20138        | AY848491 | No call differences         | No morphological differences                             |
| <i>Boophis pauliani</i>        | <i>Boophis pauliani</i>        | Andasibe                                 | ZSM 345/2000     | AJ315924 |                             |                                                          |
| <i>Boophis pauliani</i>        | <i>Boophis pauliani</i>        | Ranomafana                               | ZMA 20062        | AY848458 | Unknown                     | No obvious morphological differences                     |
| <i>Boophis pauliani</i>        | <i>Boophis pauliani</i>        | Tolagnaro                                | ZSM 159/2002     | AY848493 | Unknown                     | No obvious morphological differences                     |
| <i>Boophis periegetes</i>      | <i>Boophis periegetes</i>      | Andohahela                               | FGZC 2430        | FJ559130 |                             |                                                          |
| <i>Boophis picturatus</i>      | <i>Boophis picturatus</i>      | An'Ala                                   | ZCMV 1457        | FJ559131 |                             |                                                          |
| <i>Boophis picturatus</i>      | <i>Boophis picturatus</i>      | Ranomafana (Maharira)                    | UADBA 24282      | AY848644 | No call differences         | Only slight chromatic differences                        |
| <i>Boophis pyrrhus</i>         | <i>Boophis pyrrhus</i>         | Ifanadiana                               | UADBA 24315      | AY848645 |                             |                                                          |
| <i>Boophis pyrrhus</i>         | <i>Boophis pyrrhus</i>         | Sahavontsira                             | MVTIS AC462 5598 | FJ559132 | Unknown                     | Not assessed in detail, but no obvious differences noted |
| <i>Boophis rappiodes</i>       | <i>Boophis rappiodes</i>       | Andasibe                                 | UADBA 2000.59    | AJ314816 |                             |                                                          |
| <i>Boophis rappiodes</i>       | <i>Boophis rappiodes</i>       | Ranomafana                               | ZSM 752/2003     | AY848669 | No call differences         | No morphological differences                             |
| <i>Boophis reticulatus</i>     | <i>Boophis reticulatus</i>     | Maharira                                 | ZMA (ZCMV 211)   | AY848613 |                             |                                                          |
| <i>Boophis reticulatus</i>     | <i>Boophis reticulatus</i>     | Vohidrazana                              | FGMV 2002.3045   | AY848612 | No obvious call differences | No obvious morphological differences                     |
| <i>Boophis rhodoscelis</i>     | <i>Boophis rhodoscelis</i>     | Ranomafana                               | ZMA (ZCMV 316)   | AY848620 |                             |                                                          |
| <i>Boophis rufiocularis</i>    | <i>Boophis rufiocularis</i>    | An'Ala                                   | 2002.GA272       | AY848623 |                             |                                                          |
| <i>Boophis sambirano</i>       | <i>Boophis sambirano</i>       | Manongarivo                              | ZSM 810/2003     | AY848544 |                             |                                                          |
| <i>Boophis schuboeae</i>       | <i>Boophis schuboeae</i>       | Ranomafana                               | ZFMK 62907       | AJ315912 |                             |                                                          |
| <i>Boophis septentrionalis</i> | <i>Boophis septentrionalis</i> | Montagne d'Ambre                         | ZSM 900/2003     | AY848505 |                             |                                                          |
| <i>Boophis sibilans</i>        | <i>Boophis sibilans</i>        | Andasibe                                 | ZSM 39/2002      | DQ235435 |                             |                                                          |
| <i>Boophis solomaso</i>        | <i>Boophis solomaso</i>        | Ambavaniasy                              | NMBE 1046008     | AJ315920 |                             |                                                          |



|                       |                                                             |                             |                |          |                                                                          |                                                                                                   |
|-----------------------|-------------------------------------------------------------|-----------------------------|----------------|----------|--------------------------------------------------------------------------|---------------------------------------------------------------------------------------------------|
| <i>Boophis</i> sp. 1  | Not included                                                | Mayotte (Comoro Islands)    | ZSM 658/2000   | FJ559133 | Not assessed                                                             | Chromatic differences (iris color) and larger body size                                           |
| <i>Boophis</i> sp. 2  | <i>Boophis</i> sp. "calcaratus"                             | Ambavaniasy                 | NMBE 862/95    | FJ559134 | Unknown                                                                  | Unique morphology                                                                                 |
| <i>Boophis</i> sp. 4  | <i>Boophis</i> sp. aff. <i>occidentalis</i>                 | Berara                      | MRSN A2000     | AJ314820 | Qualitative differences                                                  | Constant chromatic differences                                                                    |
| <i>Boophis</i> sp. 5  | <i>Boophis</i> sp. aff. <i>albilabris</i> "red eyes"        | Veveembe                    | ZMA 20131      | AY848528 | Unknown                                                                  | Chromatic differences, elevational separation                                                     |
| <i>Boophis</i> sp. 6  | <i>Boophis</i> sp. aff. <i>albilabris</i> "reticulated lip" | Masoala                     | FAZC 2030      | FJ559135 | Unknown                                                                  | Distinct chromatic and size differences                                                           |
| <i>Boophis</i> sp. 7  | Not included                                                | Marojejy                    | FGZC 2280      | FJ559136 | Unknown                                                                  | Unknown                                                                                           |
| <i>Boophis</i> sp. 8  | <i>Boophis</i> sp. aff. <i>rufioculis</i>                   | Ranomafana (Maharira)       | ZMA 20193      | AY848535 | Uassessed                                                                | Slight qualitative differences                                                                    |
| <i>Boophis</i> sp. 10 | Not included                                                | Ambolokopatrika             | FAZC 7331      | FJ559137 | Unknown                                                                  | Unknown                                                                                           |
| <i>Boophis</i> sp. 11 | <i>Boophis brachychir</i>                                   | Montagne d'Ambre            | ZSM 899/2003   | AY848563 | Strong qualitative differences                                           | Distinct differences                                                                              |
| <i>Boophis</i> sp. 12 | <i>Boophis</i> sp. aff. <i>madagascariensis</i> "North"     | Montagne d'Ambre            | ZSM 898/2003   | AY848577 | Unknown                                                                  | Chromatic differences                                                                             |
| <i>Boophis</i> sp. 13 | <i>Boophis</i> sp. aff. <i>goudoti</i>                      | Ranomafana (Ranomafanakely) | ZMA 20219      | AY848606 | Quantitative differences                                                 | Differences in color and skin texture                                                             |
| <i>Boophis</i> sp. 14 | <i>Boophis</i> sp.                                          | Ambohitantely               | FGZC 2204      | FJ559138 | Unknown                                                                  | Unknown                                                                                           |
| <i>Boophis</i> sp. 15 | <i>Boophis</i> sp.                                          | Ranomafana (Ambatolahy)     | ZSM (ZCMV 691) | AY848539 | Unknown                                                                  | Unique morphology                                                                                 |
| <i>Boophis</i> sp. 16 | <i>Boophis</i> sp. aff. <i>boehmei</i>                      | Ranomafana                  | ZCMV 3045      | FJ559139 | No obvious differences                                                   | Slight but constant differences - CCS because of very strong and constant genetic differentiation |
| <i>Boophis</i> sp. 17 | <i>Boophis</i> sp. aff. <i>sibilans</i>                     | Ranomafana (Ambatolahy)     | ZMA 20306      | AY848443 | Only quantitative call differences to <i>B. sibilans</i>                 | No differences in morphology; CCS because of sympatric occurrence and constant call differences   |
| <i>Boophis</i> sp. 18 | <i>Boophis</i> sp. aff. <i>ankaratra</i> "Antoetra slow"    | Antoetra region             | FAZC 11454     | FJ559140 | Strong quantitative call differences; sympatric with <i>B. ankaratra</i> | Unknown                                                                                           |

|                       |                                                            |               |                         |          |                                                                                       |                                                                             |
|-----------------------|------------------------------------------------------------|---------------|-------------------------|----------|---------------------------------------------------------------------------------------|-----------------------------------------------------------------------------|
| <i>Boophis</i> sp. 19 | <i>Boophis</i> sp. aff. <i>ankaratra</i> "Andohahela slow" | Andohahela    | FGZC 2389               | FJ559141 | Quantitative call differences to <i>B. ankaratra</i> ; likely geographically isolated | No differences                                                              |
| <i>Boophis</i> sp. 20 | <i>Boophis</i> sp. aff. <i>ankaratra</i> "Andohahela fast" | Andohahela    | FGZC 2390               | FJ559142 | Quantitative call differences to <i>B. schuboeae</i> ; likely geographically isolated | No differences                                                              |
| <i>Boophis</i> sp. 21 | Not included                                               | Ambohitantely | FGZC 2201               | FJ559143 | Unknown                                                                               | Unknown                                                                     |
| <i>Boophis</i> sp. 22 | <i>Boophis</i> sp. aff. <i>elenae</i>                      | Ranomafana    | ZMA 20133               | AY848442 | Qualitative call differences                                                          | Chromatic differences and smaller body size                                 |
| <i>Boophis</i> sp. 23 | Not included                                               | Marojejy      | FGZC 2243               | FJ559144 | Unknown                                                                               | Unknown                                                                     |
| <i>Boophis</i> sp. 24 | Not included                                               | Sahavontsira  | MVTIS AC460 / FAZC 5591 | FJ559145 | Unknown                                                                               | Unknown                                                                     |
| <i>Boophis</i> sp. 25 | Not included                                               | Marojejy      | FGZC 2929               | FJ559146 | Unknown                                                                               | Unknown                                                                     |
| <i>Boophis</i> sp. 26 | Not included                                               | Marojejy      | FGZC 2953               | FJ559147 | Unknown                                                                               | Unknown                                                                     |
| <i>Boophis</i> sp. 27 | <i>Boophis</i> sp. aff. <i>mandraka</i> "North"            | Masoala       | FAZC 7805               | FJ559148 | Unknown                                                                               | Unknown                                                                     |
| <i>Boophis</i> sp. 28 | <i>Boophis</i> sp. aff. <i>mandraka</i> "North"            | Marojejy      | ZCMV 2062               | FJ559149 |                                                                                       |                                                                             |
| <i>Boophis</i> sp. 29 | <i>Boophis</i> sp. aff. <i>miniatus</i> "Mahakajy"         | Mahakajy      | UADBA 24299             | AY848632 | Unknown                                                                               | Probable morphological differences                                          |
| <i>Boophis</i> sp. 30 | <i>Boophis</i> sp. aff. <i>rhodoscelis</i> "Ranomafana"    | Ranomafana    | ZCMV 320                | AY848627 | Qualitative differences                                                               | Slight but constant differences to all related species                      |
| <i>Boophis</i> sp. 33 | <i>Boophis</i> sp. aff. <i>microtypanum</i>                | Andringitra   | ZSM 731/2001            | AY848597 | Possible quantitative differences                                                     | Sympatric occurrence with <i>B. microtypanum</i> at Andringitra             |
| <i>Boophis</i> sp. 34 | <i>Boophis</i> sp. aff. <i>rhodoscelis</i> "Ambohitantely" | Ambohitantely | FGZC 2139               | FJ559150 | Distinct quantitative differences                                                     | No clear differences                                                        |
| <i>Boophis</i> sp. 35 | <i>Boophis</i> sp. aff. <i>majori</i> "Ranomafana"         | Ranomafana    | ZCMV 2976               | FJ559151 | Qualitative differences; sympatric occurrence with <i>B. majori</i>                   | No differences in adult morphology, clear differences in tadpole morphology |
| <i>Boophis</i> sp. 36 | <i>Boophis</i> sp. aff. <i>elenae</i>                      | Andasibe      | MVTIS LR294             | DQ792467 | Not assessed                                                                          | Incompletely known                                                          |
| <i>Boophis</i> sp. 37 | <i>Boophis</i> sp. aff. <i>elenae</i>                      | Ranomafana    | MVTIS HG3 HP1           | FJ559152 | Unknown                                                                               | Unknown                                                                     |

|                                |                                                  |                       |                       |           |                               |                                                                                                              |
|--------------------------------|--------------------------------------------------|-----------------------|-----------------------|-----------|-------------------------------|--------------------------------------------------------------------------------------------------------------|
| <i>Boophis</i> sp. 38          | Not included                                     | Ranomafana            | ZCMV 4261             | FJ559153  | Unknown                       | Unknown                                                                                                      |
| <i>Boophis</i> sp. 39          | Not included                                     | Betampona             | FAZC 13965            | FJ559154  | Unknown                       | Unknown                                                                                                      |
| <i>Boophis</i> sp. 40          | Not included                                     | Mahasoa forest        | DRV 5635              | FJ559155  | Unknown                       | Not assessed                                                                                                 |
| <i>Boophis</i> sp. 41          | Not included                                     | Mahasoa forest        | DRV 5665              | FJ559156  | Unknown                       | Not assessed                                                                                                 |
| <i>Boophis</i> sp. 42          | Not included                                     | Ranomafana            | MVTIS HG4-HP1         | FJ559157  | Unknown                       | Unknown                                                                                                      |
| <i>Boophis tampoka</i>         | <i>Boophis</i> sp. "tampoka"                     | Bemaraha              | ZSM 96/2006           | AY848670  |                               |                                                                                                              |
| <i>Boophis tasymena</i>        | <i>Boophis tasymena</i>                          | Ranomafana (Maharira) | ZMA 20241             | AY848670  |                               |                                                                                                              |
| <i>Boophis tephraeomystax</i>  | <i>Boophis tephraeomystax</i>                    | Montagne d'Ambre      | UADBA 24183           | AY848508  |                               |                                                                                                              |
| <i>Boophis ulftunni</i>        | <i>Boophis</i> sp. aff. <i>rappiodes</i> "North" | Marojejy              | ZSM 80/2005           | EU252142  | No qualitative differences    | No obvious differences                                                                                       |
| <i>Boophis ulftunni</i>        | <i>Boophis</i> sp. aff. <i>rappiodes</i> "North" | Ilampy (Masoala)      | FAZC 10396            | EU252143  |                               |                                                                                                              |
| <i>Boophis viridis</i>         | <i>Boophis viridis</i>                           | Manombo               | UADBA 24363           | AY848679  |                               |                                                                                                              |
| <i>Boophis vittatus</i>        | <i>Boophis vittatus</i>                          | Marojejy              | ZCMV 842              | FJ559158  |                               |                                                                                                              |
| <i>Boophis vittatus</i>        | <i>Boophis vittatus</i>                          | Manongarivo           | UADBA (FGMV 2002-740) | AY848524  | No differences                | No differences                                                                                               |
| <i>Boophis williamsi</i>       | <i>Boophis williamsi</i>                         | Ankaratra             | ZSM 734/2001          | AY848624  |                               |                                                                                                              |
| <i>Boophis xerophilus</i>      | <i>Boophis xerophilus</i>                        | Kirindy               | ZFMK 66705            | AF215335  |                               |                                                                                                              |
| <i>Cophyla berara</i>          | <i>Cophyla berara</i>                            | Berara                | ZSM 410/2000          | EU34111   |                               |                                                                                                              |
| <i>Cophyla occultans</i>       | <i>Cophyla occultans</i>                         | Marojejy              | MRSN A2660            | AY5994100 |                               |                                                                                                              |
| <i>Cophyla phyllodactyla</i>   | <i>Cophyla phyllodactyla</i>                     | Nosy Be               | ZSM 460/2000          | AY730867  |                               |                                                                                                              |
| <i>Cophyla</i> sp. 1           | Not included                                     | Montagne d'Ambre      | FGZC 1866             | FJ559159  | Not assessed                  | Not assessed; CCS status because it forms sister species to <i>C. phyllodactyla</i> / <i>C. berara</i> clade |
| <i>Dyscophus antongilii</i>    | <i>Dyscophus antongilii</i>                      | Maroantsetra          | MVTIS YCHIA5          | AY834196  |                               |                                                                                                              |
| <i>Dyscophus guineti</i>       | <i>Dyscophus guineti</i>                         | Fierenana             | MVTIS YCHIA21         | AY834197  |                               |                                                                                                              |
| <i>Dyscophus insularis</i>     | <i>Dyscophus insularis</i>                       | Antsirasira           | UADBA (FGMV 2001.38)  | AY834198  |                               |                                                                                                              |
| <i>Gephyromantis ambohitra</i> | <i>Gephyromantis ambohitra</i>                   | Montagne d'Ambre      | ZSM 204/2004          | AY848309  |                               |                                                                                                              |
| <i>Gephyromantis ambohitra</i> | <i>Gephyromantis ambohitra</i>                   | Manongarivo           | ZSM 850/2003          | AY848311  | Only quantitative differences | No obvious differences                                                                                       |

|                                     |                                     |              |                  |          |                                   |                        |
|-------------------------------------|-------------------------------------|--------------|------------------|----------|-----------------------------------|------------------------|
| <i>Gephyromantis asper</i>          | <i>Gephyromantis asper</i>          | Ranomafana   | ZMA 20248        | AY848323 |                                   |                        |
| <i>Gephyromantis azzurrae</i>       | <i>Gephyromantis azzurrae</i>       | Isalo        | MRSN A5311       | EF222302 |                                   |                        |
| <i>Gephyromantis blanci</i>         | <i>Gephyromantis blanci</i>         | Andringitra  | UADBA 20819      | AY848324 |                                   |                        |
| <i>Gephyromantis boulengeri</i>     | <i>Gephyromantis boulengeri</i>     | Nosy Mangabe | ZCMV 2121        | DQ901391 |                                   |                        |
| <i>Gephyromantis boulengeri</i>     | <i>Gephyromantis boulengeri</i>     | Ambohitsara  | ZCMV 5879        | FJ559162 | Quantitative differences          | No obvious differences |
| <i>Gephyromantis boulengeri</i>     | <i>Gephyromantis boulengeri</i>     | Ranomafana   | ---              | FJ559161 | Quantitative differences          | No obvious differences |
| <i>Gephyromantis boulengeri</i>     | Not included                        | Masoala      | FAZC 7230        | FJ559163 |                                   |                        |
| <i>Gephyromantis cornutus</i>       | <i>Gephyromantis cornutus</i>       | Vohidrazana  | ZSM 164/2002     | FJ559164 |                                   |                        |
| <i>Gephyromantis corvus</i>         | <i>Gephyromantis corvus</i>         | Isalo        | ZFMK 70494       | AF215320 |                                   |                        |
| <i>Gephyromantis decaryi</i>        | <i>Gephyromantis decaryi</i>        | Vondrozo     | ZMA 20097        | AY848306 |                                   |                        |
| <i>Gephyromantis eiselti</i>        | <i>Gephyromantis eiselti</i>        | Ambavaniasy  | ZSM uncatalogued | FJ559165 |                                   |                        |
| <i>Gephyromantis enki</i>           | <i>Gephyromantis enki</i>           | Ranomafana   | UADBA (ZCMV 34)  | AY848409 |                                   |                        |
| <i>Gephyromantis granulatus</i>     | <i>Gephyromantis granulatus</i>     | Nosy Be      | not preserved    | AJ315927 |                                   |                        |
| <i>Gephyromantis granulatus</i>     | <i>Gephyromantis granulatus</i>     | Marojejy     | FGZC 2735        | FJ559166 | No differences                    | No differences         |
| <i>Gephyromantis horridus</i>       | <i>Gephyromantis horridus</i>       | Tsaratanana  | UADBA 10002      | FJ559167 |                                   |                        |
| <i>Gephyromantis klemmeri</i>       | <i>Gephyromantis klemmeri</i>       | Marojejy     | FGZC 2727        | FJ559168 |                                   |                        |
| <i>Gephyromantis leucocephalus</i>  | <i>Gephyromantis leucocephalus</i>  | Nahampoana   | ZSM 160/2002     | FJ559169 |                                   |                        |
| <i>Gephyromantis leucocephalus</i>  | <i>Gephyromantis leucocephalus</i>  | Manombo      | ZCMV 5440        | FJ559170 | Possible quantitative differences | No obvious differences |
| <i>Gephyromantis leucocephalus</i>  | <i>Gephyromantis leucocephalus</i>  | Ste. Luce    | ---              | FJ559171 |                                   |                        |
| <i>Gephyromantis leucomaculatus</i> | <i>Gephyromantis leucomaculatus</i> | Nosy Mangabe | ZSM (ZCMV 882)   | FJ559172 |                                   |                        |
| <i>Gephyromantis luteus</i>         | <i>Gephyromantis luteus</i>         | Marojejy     | ZCMV 2081        | FJ559173 |                                   |                        |
| <i>Gephyromantis malagasius</i>     | <i>Gephyromantis malagasius</i>     | Ambohitsara  | ZMA 20247        | AY848353 |                                   |                        |
| <i>Gephyromantis moseri</i>         | <i>Gephyromantis moseri</i>         | Andasibe     | ZSM 93/2002      | FJ559174 |                                   |                        |
| <i>Gephyromantis plicifer</i>       | <i>Gephyromantis plicifer</i>       | Andohahela   | ZSM 98/2004      | AY848419 |                                   |                        |
| <i>Gephyromantis pseudoasper</i>    | <i>Gephyromantis pseudoasper</i>    | Manongarivo  | MVTIS 2000D61    | AY848421 |                                   |                        |
| <i>Gephyromantis redimitus</i>      | <i>Gephyromantis redimitus</i>      | Nosy Mangabe | ZCMV 2150        | FJ559175 |                                   |                        |

|                                   |                                                           |                             |              |          |                                                |                                                                                        |
|-----------------------------------|-----------------------------------------------------------|-----------------------------|--------------|----------|------------------------------------------------|----------------------------------------------------------------------------------------|
| <i>Gephyromantis redimitus</i>    | <i>Gephyromantis redimitus</i>                            | Ranomafana                  | ZSM 743/2003 | AY848359 | No differences                                 | No differences                                                                         |
| <i>Gephyromantis redimitus</i>    | <i>Gephyromantis redimitus</i>                            | Vohidrazana                 | ZSM 152/2002 | AY848363 | No differences                                 | No differences                                                                         |
| <i>Gephyromantis redimitus</i>    | <i>Gephyromantis redimitus</i>                            | Betampona                   | FAZC 13970   | FJ559176 | No differences                                 | No differences                                                                         |
| <i>Gephyromantis rivicola</i>     | <i>Gephyromantis rivicola</i>                             | Andranofotsy                | ZSM 180/2002 | DQ235449 |                                                |                                                                                        |
| <i>Gephyromantis runewsweeki</i>  | <i>Gephyromantis runewsweeki</i>                          | Ranomafana (Maharira)       | MNCN 42085   | AY848308 |                                                |                                                                                        |
| <i>Gephyromantis salegy</i>       | <i>Gephyromantis salegy</i>                               | Ambolokopatrika             | MRSN A2046   | AY848365 |                                                |                                                                                        |
| <i>Gephyromantis schilfi</i>      | <i>Gephyromantis schilfi</i>                              | Marojejy                    | FGZC 2735    | FJ559177 |                                                |                                                                                        |
| <i>Gephyromantis sculpturatus</i> | <i>Gephyromantis sculpturatus</i>                         | Veembe                      | UADBA 24199  | FJ559178 |                                                |                                                                                        |
| <i>Gephyromantis silvanus</i>     | <i>Gephyromantis silvanus</i>                             | Nosy Mangabe                | ZCMV 888     | FJ559179 |                                                |                                                                                        |
| <i>Gephyromantis silvanus</i>     | <i>Gephyromantis silvanus</i>                             | Andranofotsy                | ZSM 178/2002 | AY848366 | Not assessed (call from type locality unknown) | No obvious differences                                                                 |
| <i>Gephyromantis</i> sp. 1        | <i>Gephyromantis</i> sp. aff. <i>ambohitra</i> "Marojejy" | Marojejy                    | ZCMV 2016    | FJ559180 | Qualitative differences                        | Not assessed                                                                           |
| <i>Gephyromantis</i> sp. 4        | <i>Gephyromantis blanci</i>                               | Ranomafana (Ranomafanakely) | ZCMV 5240    | FJ559181 | Quantitative differences                       | Not assessed                                                                           |
| <i>Gephyromantis</i> sp. 5        | <i>Gephyromantis</i> sp. aff. <i>blanci</i> "Andohahela"  | Andohahela                  | FGZC 2459    | FJ559182 | No assessed                                    | Constant morphological differences (long hindlimbs)                                    |
| <i>Gephyromantis</i> sp. 6        | <i>Gephyromantis</i> sp. aff. <i>blanci</i>               | near Farafangana            | ZCMV 5493    | FJ559183 | Qualitative differences                        | Not assessed                                                                           |
| <i>Gephyromantis</i> sp. 7        | Not included                                              | Manakara                    | ZCMV 5421    | FJ559184 | Distinct quantitative differences              | Not assessed                                                                           |
| <i>Gephyromantis</i> sp. 8        | Not included                                              | Ambohitsara                 | ZCMV 5229    | FJ559185 | Possibly quantitative differences              | Distinct color and morphological differences                                           |
| <i>Gephyromantis</i> sp. 9        | <i>Gephyromantis decaryi</i>                              | Ranomafana                  | ZCMV 5223    | FJ559186 | Possibly quantitative differences              | Distinct morphological differences                                                     |
| <i>Gephyromantis</i> sp. 10       | <i>Gephyromantis</i> sp. aff. <i>corvus</i> "Bemaraha"    | Bemaraha                    | ZSM 23/2006  | FJ559187 | Unknown                                        | Not assessed; CCS status due to very deep genetic divergences and geographic isolation |
| <i>Gephyromantis</i> sp. 11       | <i>Gephyromantis</i> sp. aff. <i>horridus</i> "Marojejy"  | Marojejy                    | FGZC 2843    | FJ559188 | Unknown                                        | Distinct differences in color and morphology                                           |
| <i>Gephyromantis</i> sp. 12       | not included                                              | Genbank sequence            | UMMZ 201404  | AY454385 | Unknown                                        | Unknown                                                                                |

|                                      |                                                                |                             |                          |          |                                              |                                                       |
|--------------------------------------|----------------------------------------------------------------|-----------------------------|--------------------------|----------|----------------------------------------------|-------------------------------------------------------|
| <i>Gephyromantis</i> sp. 13          | <i>Gephyromantis</i> sp. aff. <i>malagasius</i> "Andasibe"     | Ranomafana                  | ZMA 19421                | EF100471 | Possibly quantitative differences            | Morphological differences (presence of tibial glands) |
| <i>Gephyromantis</i> sp. 14          | <i>Gephyromantis malagasius</i>                                | Masoala                     | FAZC                     | AJ314797 | Unknown                                      | Unknown                                               |
| <i>Gephyromantis</i> sp. 15          | Not included                                                   | Andranobe (Masoala)         | FAZC 7266                | AY848367 | Unknown                                      | Unknown                                               |
| <i>Gephyromantis</i> sp. 16          | Not included                                                   | Masoala                     | FAZC 7904                | FJ559190 | Unknown                                      | Unknown                                               |
| <i>Gephyromantis</i> sp. 17          | <i>Gephyromantis</i> sp. aff. <i>leucomaculatus</i> "Marojejy" | Marojejy                    | ZCMV 2086                | FJ559191 | Possibly quantitative differences            | Differences in color and possibly a less broad head   |
| <i>Gephyromantis</i> sp. 18          | Not included                                                   | Ambolokopatrika             | FAZC 7009                | AY848414 | Unknown                                      | Unknown                                               |
| <i>Gephyromantis</i> sp. 19          | Not included                                                   | Ambolokopatrika             | FAZC 6829                | AY848404 | Unknown                                      | Unknown                                               |
| <i>Gephyromantis</i> sp. 20          | Not included                                                   | Sahavontsira                | MVTIS AC530 / FAZC 5674  | FJ559192 | Unknown                                      | Unknown                                               |
| <i>Gephyromantis</i> sp. 21          | <i>Gephyromantis plicifer</i>                                  | Antoetra                    | FAZC 11464               | AY848380 | No obvious differences to <i>G. plicifer</i> | Not assessed                                          |
| <i>Gephyromantis</i> sp. 22          | Not included                                                   | Mahasoa forest              | ZCMV 8099                | FJ559193 | Qualitative call differences                 | Larger body size                                      |
| <i>Gephyromantis</i> sp. 23          | Not included                                                   | Betampona                   | FAZC 13778               | FJ559194 | Unknown                                      | Unknown                                               |
| <i>Gephyromantis</i> sp. 24          | Not included                                                   | Torotorofotsy               | ZCMV 8103                | FJ559195 | Quantitative differences                     | Smaller body size                                     |
| <i>Gephyromantis</i> sp. 25          | Not included                                                   | Mahasoa forest              | ZCMV 8089                | FJ559196 | Qualitative call differences                 | Not assessed                                          |
| <i>Gephyromantis</i> sp. 26          | Not included                                                   | Mahasoa forest              | ZCMV 8100                | FJ559197 | Qualitative call differences                 | Not assessed                                          |
| <i>Gephyromantis</i> sp. 27          | <i>Gephyromantis asper</i>                                     | Mandraka                    | MVTIS E52-41             | FJ559160 | Qualitative differences                      | Not assessed                                          |
| <i>Gephyromantis spinifer</i>        | <i>Gephyromantis spinifer</i>                                  | Midongy du Sud              | UADBA 25495              | FJ559198 |                                              |                                                       |
| <i>Gephyromantis striatus</i>        | <i>Gephyromantis striatus</i>                                  | Marojejy                    | FGZC 2774                | AY341650 |                                              |                                                       |
| <i>Gephyromantis tandroka</i>        | <i>Gephyromantis tandroka</i>                                  | Marojejy                    | FGZC 2816                | FJ559199 |                                              |                                                       |
| <i>Gephyromantis thelenae</i>        | <i>Gephyromantis thelenae</i>                                  | Mantadia                    | UADBA (FGMV 2001.1014)   | AY848331 |                                              |                                                       |
| <i>Gephyromantis tschenki</i>        | <i>Gephyromantis tschenki</i>                                  | Ranomafana                  | ZSM 651/2003 / ZMA 19392 | AY848377 |                                              |                                                       |
| <i>Gephyromantis ventrimaculatus</i> | <i>Gephyromantis ventrimaculatus</i>                           | Ranomafana (Ranomafanakely) | ZCMV 3362                | FJ559200 |                                              |                                                       |
| <i>Gephyromantis webbi</i>           | <i>Gephyromantis webbi</i>                                     | Nosy Mangabe                | ZCMV 872                 | FJ559201 |                                              |                                                       |

|                                  |                                                               |                         |                  |          |                                                                 |                                                                                                           |
|----------------------------------|---------------------------------------------------------------|-------------------------|------------------|----------|-----------------------------------------------------------------|-----------------------------------------------------------------------------------------------------------|
| <i>Gephyromantis zavona</i>      | <i>Gephyromantis zavona</i>                                   | Tsaratanana             | ZSM 627/2001     | AJ314795 |                                                                 |                                                                                                           |
| <i>Guibemantis albolineatus</i>  | <i>Guibemantis albolineatus</i>                               | Andohahela              | FGZC 2432        | FJ559202 |                                                                 |                                                                                                           |
| <i>Guibemantis bicalcaratus</i>  | <i>Guibemantis bicalcaratus</i>                               | Nosy Boraha             | ZCMV 3244        | FJ559203 |                                                                 |                                                                                                           |
| <i>Guibemantis depressiceps</i>  | <i>Guibemantis depressiceps</i>                               | Ranomafana (Vohiparara) | ZMA 20238        | AY848066 |                                                                 |                                                                                                           |
| <i>Guibemantis flavobrunneus</i> | <i>Guibemantis flavobrunneus</i>                              | Mangoro river region    | FGZC 2655        | EF472510 |                                                                 |                                                                                                           |
| <i>Guibemantis kathrinae</i>     | <i>Guibemantis kathrinae</i>                                  | An'Ala                  | MVTIS GA2002     | AY684189 |                                                                 |                                                                                                           |
| <i>Guibemantis liber</i>         | <i>Guibemantis liber</i>                                      | Mandraka                | UADBA 20601      | AY848084 |                                                                 |                                                                                                           |
| <i>Guibemantis liber</i>         | <i>Guibemantis liber</i>                                      | Montagne d'Ambre        | ZMA 19644        | EF472528 | Quantitative call differences                                   | No differences                                                                                            |
| <i>Guibemantis liber</i>         | <i>Guibemantis liber</i>                                      | Ranomafana              | UADBA 20601      | DQ235422 | No obvious call differences                                     | No differences                                                                                            |
| <i>Guibemantis liber</i>         | <i>Guibemantis liber</i>                                      | Ambatodisakoana         | ZCMV 8087        | FJ559204 | No obvious call differences                                     | No differences; phylogeographic signal of admixture                                                       |
| <i>Guibemantis pulcher</i>       | <i>Guibemantis pulcher</i>                                    | Ranomafana              | ZMA 20242        | AY848096 |                                                                 |                                                                                                           |
| <i>Guibemantis punctatus</i>     | <i>Guibemantis punctatus</i>                                  | Ambohitantely           | ZCMV 5501        | FJ559205 |                                                                 |                                                                                                           |
| <i>Guibemantis</i> sp. 1         | Not included                                                  | Ankavanana              | UMMZ 213093      | FJ559206 | Unknown                                                         | Unknown                                                                                                   |
| <i>Guibemantis</i> sp. 2         | Not included                                                  | Marojejy                | UMMZ 231070      | EF472517 | Unknown                                                         | Unknown                                                                                                   |
| <i>Guibemantis</i> sp. 3         | <i>Guibemantis</i> sp. aff. <i>albolineatus</i> "Andasibe"    | Andasibe                | ZSM 250/2002     | AY454376 | Unknown                                                         | Color differences                                                                                         |
| <i>Guibemantis</i> sp. 5         | <i>Guibemantis</i> sp. aff. <i>liber</i> "South"              | Vevembe                 | ZMA 20115        | FJ559207 | Qualitative call differences to <i>G. liber</i>                 | Distinct morphological difference                                                                         |
| <i>Guibemantis</i> sp. 6         | <i>Guibemantis</i> sp. aff. <i>punctatus</i>                  | Ste. Luce               | RML 290          | EF472520 | Unknown                                                         | Color differences                                                                                         |
| <i>Guibemantis</i> sp. 7         | <i>Guibemantis</i> sp. aff. <i>bicalcaratus</i> "South"       | Ste Luce                | FGZC 2588        | EF472508 | Unknown                                                         | Possible color differences                                                                                |
| <i>Guibemantis</i> sp. 8         | <i>Guibemantis</i> sp. aff. <i>bicalcaratus</i> "Moramanga"   | Besariaka               | UADBA (ZCMV 466) | AY848035 | Call of typical <i>G. bicalcaratus</i> not known for comparison | No obvious differences                                                                                    |
| <i>Guibemantis</i> sp. 9         | Not included                                                  | Nosy Boraha             | ZCMV 3240        | FJ559208 | Unknown                                                         | Distinct color differences to <i>G. bicalcaratus</i> ; CCS because of syntopy with <i>G. bicalcaratus</i> |
| <i>Guibemantis</i> sp. 10        | <i>Guibemantis</i> sp. aff. <i>flavobrunneus</i> "Ranomafana" | Manombo                 | ZMA 20119        | AY848076 | Unknown                                                         | Distinct color differences                                                                                |

|                                     |                                                               |                         |                        |          |                              |                                                       |
|-------------------------------------|---------------------------------------------------------------|-------------------------|------------------------|----------|------------------------------|-------------------------------------------------------|
| <i>Guibemantis</i> sp. 11           | Not included                                                  | Ste. Luce               | RML 262<br>or RML 132  | EF472518 | Unknown                      | Unknown                                               |
| <i>Guibemantis</i> sp. 12           | <i>Guibemantis</i> sp. aff. <i>bicalcaratus</i> "Manongarivo" | Manongarivo             | ZMA 19582              | FJ559209 | Unknown                      | Not assessed                                          |
| <i>Guibemantis</i> sp. 13           | Not included                                                  | Andringitra             | UMMZ 212929            | EF472511 | Unknown                      | Not assessed                                          |
| <i>Guibemantis</i> sp. 14           | <i>Guibemantis</i> sp. aff. <i>punctatus</i> "Fierenana"      | Fierenana               | ZMA 19347              | FJ559210 | Unknown                      | Distinct color differences                            |
| <i>Guibemantis</i> sp. 15           | Not included                                                  | Marojejy                | ZCMV 2044              | EF472505 | Unknown                      | Not assessed                                          |
| <i>Guibemantis</i> sp. 16           | Not included                                                  | Cap Est                 | UMMZ 212922            | EF472512 | Unknown                      | Unknown                                               |
| <i>Guibemantis</i> sp. 17           | Not included                                                  | Marojejy                | ZCMV 2011              | FJ559211 | Unknown                      | Not assessed                                          |
| <i>Guibemantis</i> sp. 18           | Not included                                                  | Masoala (Ilampy)        | FAZC 10334             | AY848063 | Unknown                      | Unknown                                               |
| <i>Guibemantis</i> sp. 19           | <i>Guibemantis</i> sp. aff. <i>depressiceps</i> "Andohahela"  | Andohahela              | FGZC 2434              | EF488668 | Unknown                      | Differences in body size, color, and possibly ecology |
| <i>Guibemantis</i> sp. 20           | <i>Guibemantis</i> sp. aff. <i>timidus</i>                    | Manombo                 | ZCMV 5496              | FJ559212 | Qualitative call differences | Distinct morphological differences                    |
| <i>Guibemantis timidus</i>          | <i>Guibemantis timidus</i>                                    | Toamasina               | ZMA 19492              | AY684185 |                              |                                                       |
| <i>Guibemantis timidus</i>          | <i>Guibemantis timidus</i>                                    | Manombo                 | UADBA (ZCMV 452)       | FJ559213 | No obvious differences       | No obvious differences                                |
| <i>Guibemantis tornieri</i>         | <i>Guibemantis tornieri</i>                                   | Mantadia                | UADBA (FGMV 2001 1094) | FJ559214 |                              |                                                       |
| <i>Guibemantis tornieri</i>         | <i>Guibemantis tornieri</i>                                   | Ranomafana (Vohiparara) | ZCMV 179               | AY848103 |                              |                                                       |
| <i>Heterixalus alboguttatus</i>     | <i>Heterixalus alboguttatus</i>                               | Ranomafana              | not preserved          | EF646689 |                              |                                                       |
| <i>Heterixalus andrakata</i>        | <i>Heterixalus andrakata</i>                                  | Montagne des Francais   | ZSM 508/2000           | EF646676 |                              |                                                       |
| <i>Heterixalus betsileo</i>         | <i>Heterixalus betsileo</i>                                   | Andringitra             | ZSM 718/2001           | EF646668 |                              |                                                       |
| <i>Heterixalus boettgeri</i>        | <i>Heterixalus boettgeri</i>                                  | Tolagnaro               | not preserved          | EF646690 |                              |                                                       |
| <i>Heterixalus carbonei</i>         | <i>Heterixalus carbonei</i>                                   | Bemaraha                | MSNG 49090             | EF646691 |                              |                                                       |
| <i>Heterixalus luteostriatus</i>    | <i>Heterixalus luteostriatus</i>                              | Ankarafantsika          | UADBA (FGMV 2000.274)  | EF646665 |                              |                                                       |
| <i>Heterixalus madagascariensis</i> | <i>Heterixalus madagascariensis</i>                           | Sambava                 | ZSM 568/2000           | EF646682 |                              |                                                       |
| <i>Heterixalus punctatus</i>        | <i>Heterixalus punctatus</i>                                  | Andasibe                | ZSM 683/2001           | EF646670 |                              |                                                       |
| <i>Heterixalus punctatus</i>        | <i>Heterixalus punctatus</i>                                  | Sambava                 | ZSM 571/2000           | EF646679 | No obvious differences       | Color pattern differences (no black spots)            |



|                                  |                                                   |                  |                        |          |                        |                                                                                                                                                  |
|----------------------------------|---------------------------------------------------|------------------|------------------------|----------|------------------------|--------------------------------------------------------------------------------------------------------------------------------------------------|
| <i>Heterixalus rutenbergi</i>    | <i>Heterixalus rutenbergi</i>                     | Itremo           | ZSM 789/2001           | EF646667 |                        |                                                                                                                                                  |
| <i>Heterixalus tricolor</i>      | <i>Heterixalus tricolor</i>                       | Ankarafantsika   | ZSM 698/2001           | EF646663 |                        |                                                                                                                                                  |
| <i>Heterixalus variabilis</i>    | <i>Heterixalus variabilis</i>                     | Nosy Faly        | not preserved          | EF646684 |                        |                                                                                                                                                  |
| <i>Hoplobatrachus tigerinus</i>  | <i>Hoplobatrachus tigerinus</i>                   | Antsiranana      | ZSM 503/2000           | AY014370 |                        |                                                                                                                                                  |
| <i>Laliostoma labrosum</i>       | <i>Laliostoma labrosum</i>                        | Bemaraha         | ZSM 16/2006            | FJ559215 |                        |                                                                                                                                                  |
| <i>Mantella aurantiaca</i>       | <i>Mantella aurantiaca</i>                        | Torotorofotsy    | ZCMV 2048              | FJ559216 |                        |                                                                                                                                                  |
| <i>Mantella baroni</i>           | <i>Mantella baroni</i>                            | Ranomena         | ZCMV 3343              | FJ559217 |                        |                                                                                                                                                  |
| <i>Mantella bernhardi</i>        | <i>Mantella bernhardi</i>                         | Veveembe         | ZMA 20190              | FJ559218 |                        |                                                                                                                                                  |
| <i>Mantella betsileo</i>         | <i>Mantella betsileo</i>                          | Isalo            | MVTIS AC155            | FJ559219 |                        |                                                                                                                                                  |
| <i>Mantella cowani</i>           | <i>Mantella cowani</i>                            | Antoetra         | MVTIS KCW112           | FJ559220 |                        |                                                                                                                                                  |
| <i>Mantella crocea</i>           | <i>Mantella crocea</i>                            | Ampangadimbolana | MVTIS CS61             | AJ438897 |                        |                                                                                                                                                  |
| <i>Mantella ebenau</i>           | <i>Mantella ebenau</i>                            | Nosy Be          | UADBA<br>(FGMV 2001.6) | FJ559221 |                        |                                                                                                                                                  |
| <i>Mantella expectata</i>        | <i>Mantella expectata</i>                         | pet trade        | MVTIS CS06             | AJ438889 |                        |                                                                                                                                                  |
| <i>Mantella haraldmeieri</i>     | <i>Mantella haraldmeieri</i>                      | Manatantely      | ZSM 156/2004           | FJ559222 |                        |                                                                                                                                                  |
| <i>Mantella laevigata</i>        | <i>Mantella laevigata</i>                         | Marojejy         | FGZC 2760              | FJ559223 |                        |                                                                                                                                                  |
| <i>Mantella madagascariensis</i> | <i>Mantella madagascariensis</i>                  | Ranomafana       | ZSM 670/2003           | FJ559224 |                        |                                                                                                                                                  |
| <i>Mantella manery</i>           | <i>Mantella manery</i>                            | Marojejy         | ZSM (uncatalogued)     | FJ559225 |                        |                                                                                                                                                  |
| <i>Mantella milotympanum</i>     | <i>Mantella milotympanum</i>                      | Fierenana        | ZMA 19317              | FJ559226 |                        |                                                                                                                                                  |
| <i>Mantella nigricans</i>        | <i>Mantella nigricans</i>                         | Marojejy         | ZCMV 846               | FJ559227 |                        |                                                                                                                                                  |
| <i>Mantella pulchra</i>          | <i>Mantella pulchra</i>                           | An'Ala           | ZCMV 2490              | FJ559228 |                        |                                                                                                                                                  |
| <i>Mantella</i> sp. 1            | <i>Mantella</i> sp. aff. <i>expectata</i> "South" | Tranomaro        | FGZC 2325              | FJ559229 | No obvious differences | Distinct color differences; CCS due to constant genetic differences, widespread distribution and lack of diagnostic color of <i>M. expectata</i> |
| <i>Mantella viridis</i>          | <i>Mantella viridis</i>                           | pet trade        | MVTIS CS05             | FJ559230 |                        |                                                                                                                                                  |
| <i>Mantidactylus aerumnalis</i>  | <i>Mantidactylus aerumnalis</i>                   | An'Ala           | MVTIS 2002A2           | AY848125 |                        |                                                                                                                                                  |

|                                    |                                    |                  |                            |          |                     |                              |
|------------------------------------|------------------------------------|------------------|----------------------------|----------|---------------------|------------------------------|
| <i>Mantidactylus albofrenatus</i>  | <i>Mantidactylus albofrenatus</i>  | Andasibe         | UADBA<br>(FGMV 2001.1169)  | AY848267 |                     |                              |
| <i>Mantidactylus albofrenatus</i>  | <i>Mantidactylus albofrenatus</i>  | Sahavontsira     | MVTIS AC481 5635           | FJ559231 |                     |                              |
| <i>Mantidactylus alutus</i>        | <i>Mantidactylus alutus</i>        | Mantaoa          | ZSM 355/2000               | FJ559232 |                     |                              |
| <i>Mantidactylus ambreensis</i>    | <i>Mantidactylus ambreensis</i>    | Montagne d'Ambre | ZSM 229/2004               | AY848129 |                     |                              |
| <i>Mantidactylus argenteus</i>     | <i>Mantidactylus argenteus</i>     | Mantadia         | ZSM 47/2002                | DQ235447 |                     |                              |
| <i>Mantidactylus bellyi</i>        | <i>Mantidactylus bellyi</i>        | Montagne d'Ambre | MVTIS E179                 | FJ559233 |                     |                              |
| <i>Mantidactylus betsileanus</i>   | <i>Mantidactylus betsileanus</i>   | Andasibe         | ZCMV 3260                  | FJ559234 |                     |                              |
| <i>Mantidactylus biporus</i>       | <i>Mantidactylus biporus</i>       | Moramanga        | ZCMV 3259                  | FJ559235 |                     |                              |
| <i>Mantidactylus bourgati</i>      | <i>Mantidactylus bourgati</i>      | Andringitra      | MVTIS_E53_9                | AY848237 |                     |                              |
| <i>Mantidactylus brevipalmatus</i> | <i>Mantidactylus brevipalmatus</i> | Antoetra         | UADBA 21181                | AY848132 |                     |                              |
| <i>Mantidactylus charlotteae</i>   | <i>Mantidactylus charlotteae</i>   | Nosy Mangabe     | ZCMV 2115                  | FJ559236 |                     |                              |
| <i>Mantidactylus cowanii</i>       | <i>Mantidactylus cowanii</i>       | Mantadia         | ZSM 171/2002               | AY341711 |                     |                              |
| <i>Mantidactylus curtus</i>        | <i>Mantidactylus curtus</i>        | Col de Tapias    | UADBA<br>(ZCMV 10)         | AY848288 |                     |                              |
| <i>Mantidactylus delormei</i>      | <i>Mantidactylus delormei</i>      | Andringitra      | ZSM 751/2001               | AY848148 |                     |                              |
| <i>Mantidactylus femoralis</i>     | <i>Mantidactylus femoralis</i>     | Isalo            | ZMA 19469                  | AY848138 |                     |                              |
| <i>Mantidactylus grandidieri</i>   | <i>Mantidactylus grandidieri</i>   | Ambohitsara      | ZMA 20216                  | AY848168 |                     |                              |
| <i>Mantidactylus guttulatus</i>    | <i>Mantidactylus guttulatus</i>    | Tsaratanana      | ZSM 644/2001               | FJ559237 |                     |                              |
| <i>Mantidactylus lugubris</i>      | <i>Mantidactylus lugubris</i>      | Andasibe         | ZSM 166/2002               | AY848178 |                     |                              |
| <i>Mantidactylus lugubris</i>      | <i>Mantidactylus lugubris</i>      | Sahavontsira     | MVTIS AC517 /<br>FAZC 5584 | FJ559238 |                     |                              |
| <i>Mantidactylus madecassus</i>    | <i>Mantidactylus madecassus</i>    | Andringitra      | UADBA 20639                | AY848297 |                     |                              |
| <i>Mantidactylus majori</i>        | <i>Mantidactylus majori</i>        | Ranomafana       | UADBA 20639                | AY848187 |                     |                              |
| <i>Mantidactylus melanopleura</i>  | <i>Mantidactylus melanopleura</i>  | Andasibe         | UADBA<br>(FGMV 1276)       | FJ559239 |                     |                              |
| <i>Mantidactylus melanopleura</i>  | <i>Mantidactylus melanopleura</i>  | Andohahela       | UADBA<br>(FGZC 186)        | AY848193 | No call differences | No morphological differences |
| <i>Mantidactylus melanopleura</i>  | <i>Mantidactylus melanopleura</i>  | Ranomafana       | ZSM 669/2003               | AY848195 |                     |                              |
| <i>Mantidactylus noralottae</i>    | <i>Mantidactylus noralottae</i>    | Isalo            | MRSN 5254                  | EF222308 |                     |                              |
| <i>Mantidactylus opiparis</i>      | <i>Mantidactylus opiparis</i>      | Ambohitantely    | FGZC 2125                  | FJ559240 |                     |                              |

|                               |                                                              |                       |                         |          |                                    |                                                                                                                         |
|-------------------------------|--------------------------------------------------------------|-----------------------|-------------------------|----------|------------------------------------|-------------------------------------------------------------------------------------------------------------------------|
| <i>Mantidactylus pauliani</i> | <i>Mantidactylus pauliani</i>                                | Ankaratra             | ZSM 756/2001            | AY848298 |                                    |                                                                                                                         |
| <i>Mantidactylus</i> sp. 1    | <i>Mantidactylus aerumnalis</i>                              | Ranomafana            | ZMA 19404               | AY848126 | Unknown                            | Constant color differences                                                                                              |
| <i>Mantidactylus</i> sp. 2    | Not included                                                 | Sahavontsira          | MVTIS AC482 / FAZC 5585 | FJ559241 | Unknown                            | Unknown                                                                                                                 |
| <i>Mantidactylus</i> sp. 3    | Not included                                                 | Ambohitantely         | FGZC 2161               | FJ559242 | Probably distinct call differences | Not assessed                                                                                                            |
| <i>Mantidactylus</i> sp. 4    | <i>Mantidactylus charlotteae</i>                             | Ranomafana (Maharira) | ZMA 20038               | AY848135 | Unknown                            | Not assessed                                                                                                            |
| <i>Mantidactylus</i> sp. 5    | Not included                                                 | Farimazava            | FAZC 11520              | FJ559243 | Unknown                            | Unknown                                                                                                                 |
| <i>Mantidactylus</i> sp. 6    | Not included                                                 | Sahavontsira          | MVTIS AC489 / FAZC 5642 | FJ559244 | Unknown                            | Unknown                                                                                                                 |
| <i>Mantidactylus</i> sp. 7    | <i>Mantidactylus tricinctus</i>                              | Manantantely          | ZSM 146/2004            | AY848141 | Unknown                            | Distinct color differences                                                                                              |
| <i>Mantidactylus</i> sp. 9    | <i>Mantidactylus charlotteae</i>                             | Ambohitsara           | ZCMV 67                 | AY848287 | Unknown                            | Not assessed                                                                                                            |
| <i>Mantidactylus</i> sp. 10   | Not included                                                 | Ampasimazava          | MVTIS AC478 5541        | FJ559245 | Unknown                            | Unknown                                                                                                                 |
| <i>Mantidactylus</i> sp. 11   | <i>Mantidactylus charlotteae</i>                             | Andranofotsy          | MVTIS 2002 A53          | FJ559246 | Unknown                            | No obvious morphological differences                                                                                    |
| <i>Mantidactylus</i> sp. 12   | <i>Mantidactylus charlotteae</i>                             | Marojejy              | FGZC 2733               | FJ559247 | Unknown                            | No obvious morphological differences                                                                                    |
| <i>Mantidactylus</i> sp. 13   | <i>Mantidactylus charlotteae</i>                             | Ranomafana            | ZSM 748/2003            | FJ559248 | Qualitative differences            | Distinct differences                                                                                                    |
| <i>Mantidactylus</i> sp. 14   | <i>Mantidactylus</i> sp. aff. <i>ulcerosus</i> "Isalo"       | Isalo                 | ZSM 23/2004             | AY848286 | Qualitative differences            | Slight differences                                                                                                      |
| <i>Mantidactylus</i> sp. 15   | Not included                                                 | Sahavontsira          | MVTIS AC488 5633        | FJ559249 | Unknown                            | Unknown                                                                                                                 |
| <i>Mantidactylus</i> sp. 16   | <i>Mantidactylus</i> sp. aff. <i>biporus</i> "Andranofotsy"  | Marojejy              | ZCMV 2017               | FJ559250 | Unknown                            | Unknown                                                                                                                 |
| <i>Mantidactylus</i> sp. 17   | <i>Mantidactylus</i> sp. aff. <i>biporus</i> "Ambohitantely" | Ambohitantely         | FGZC 2146               | FJ559251 | Possibly quantitative differences  | Slight differences                                                                                                      |
| <i>Mantidactylus</i> sp. 18   | <i>Mantidactylus</i> sp. aff. <i>curtus</i> "Ambohitantely"  | Ambohitantely         | FGZC 2143               | FJ559252 | Unknown                            | Slight but constant color differences                                                                                   |
| <i>Mantidactylus</i> sp. 19   | <i>Mantidactylus</i> sp. aff. <i>curtus</i> "Ankaratra"      | Ankaratra             | UADBA (FGMV 2002.2109)  | AY848254 | Probably no distinct differences   | Slight differences to <i>M. curtus</i>                                                                                  |
| <i>Mantidactylus</i> sp. 20   | <i>Mantidactylus</i> sp. aff. <i>pauliani</i> "Itremo"       | Itremo                | ZSM 763/2001            | AY848219 | Unknown                            | Size differences to <i>M. pauliani</i> , morphological and probably ecological differences to syntopic <i>M. curtus</i> |
| <i>Mantidactylus</i> sp. 21   | Not included                                                 | Cap Est               | ZFMK 72048              | AF215323 | Unknown                            | Slight morphological differences                                                                                        |

|                             |                                                                          |                                      |                         |          |                                        |                                                                  |
|-----------------------------|--------------------------------------------------------------------------|--------------------------------------|-------------------------|----------|----------------------------------------|------------------------------------------------------------------|
| <i>Mantidactylus</i> sp. 22 | <i>Mantidactylus</i> sp. aff. <i>biporus</i> "Andranofotsy"              | Andranofotsy                         | ZSM 122/2002            | FJ559253 | Possibly quantitative differences      | Slight morphological differences                                 |
| <i>Mantidactylus</i> sp. 23 | <i>Mantidactylus</i> sp. aff. <i>biporus</i> "Andasibe"                  | Andasibe                             | ZSM 85/2002             | FJ559254 | Unknown                                | Distinct differences in head shape                               |
| <i>Mantidactylus</i> sp. 24 | <i>Mantidactylus</i> sp. aff. <i>biporus</i> "Ranomafana"                | Ranomafana                           | ZCMV 3366               | FJ559255 | Possibly quantitative differences      | Probably differences in body proportions                         |
| <i>Mantidactylus</i> sp. 25 | Not included                                                             | Ampasimazava                         | MVTIS AC486 / FAZC 5535 | FJ559256 | Unknown                                | Unknown                                                          |
| <i>Mantidactylus</i> sp. 26 | <i>Mantidactylus</i> sp. aff. <i>betsileanus</i> "Andranofotsy"          | Andranofotsy                         | ZSM 176/2002            | FJ559257 | Unique call                            | Slight morphological differences                                 |
| <i>Mantidactylus</i> sp. 27 | <i>Mantidactylus</i> sp. aff. <i>betsileanus</i> "Nosy Boraha"           | Nosy Boraha                          | ZCMV 3390               | FJ559258 | Distinct quantitative call differences | Not assessed                                                     |
| <i>Mantidactylus</i> sp. 28 | <i>Mantidactylus</i> sp. aff. <i>betsileanus</i> "slow calls"            | Andohahela                           | ZSM 91/2004             | AY848274 | Qualitative call differences           | Differences in femoral gland shape                               |
| <i>Mantidactylus</i> sp. 29 | <i>Mantidactylus</i> sp. aff. <i>betsileanus</i> "Tolagnaro"             | Andohahela                           | ZSM 70/2004             | AY848273 | Quantitative call differences          | Slight morphological differences                                 |
| <i>Mantidactylus</i> sp. 30 | <i>Mantidactylus</i> sp. aff. <i>betsileanus</i> "Andohahela"            | Andohahela                           | FGZC 2376               | FJ559259 | Qualitative call differences           | Differences in head shape                                        |
| <i>Mantidactylus</i> sp. 31 | Not included                                                             | Sahavontsira                         | MVTIS AC491 / FAZC 5530 | FJ559260 | Unknown                                | Unknown                                                          |
| <i>Mantidactylus</i> sp. 32 | <i>Mantidactylus</i> sp. aff. <i>biporus</i> "Tsaratanana Andampy"       | Manongarivo                          | UADBA (FGMV 2002.756)   | AY848263 | Qualitative call differences           | Morphological differences; sympatric with <i>M.</i> sp. 33       |
| <i>Mantidactylus</i> sp. 33 | <i>Mantidactylus</i> sp. aff. <i>biporus</i> "Tsaratanana Antsahamanara" | Tsaratanana (Antsahamanara campsite) | UADBA (MV 2001.60)      | FJ559261 | Possibly quantitative call differences | Morphological differences; sympatric with <i>M.</i> sp. 32       |
| <i>Mantidactylus</i> sp. 34 | Not included                                                             | Vohidrazana                          | UADBA (FGMV 2001.1156)  | FJ559262 | Unknown                                | Unknown                                                          |
| <i>Mantidactylus</i> sp. 35 | <i>Mantidactylus</i> sp. aff. <i>betsileanus</i> "Toamasina"             | Maroantsetra                         | ZCMV 803                | AY848259 | Possibly quantitative call differences | Slight morphological differences                                 |
| <i>Mantidactylus</i> sp. 36 | <i>Mantidactylus</i> sp. aff. <i>betsileanus</i> "Toamasina"             | Toamasina                            | ZCMV 805                | AY848260 | Possibly quantitative call differences | Slight morphological differences                                 |
| <i>Mantidactylus</i> sp. 37 | Not included                                                             | Sahavontsira                         | MVTIS AC498 5652        | FJ559263 | Unknown                                | Unknown                                                          |
| <i>Mantidactylus</i> sp. 38 | <i>Mantidactylus</i> spp. aff. <i>mocquardi</i>                          | Andasibe                             | UADBA (FGMV 2001.1277)  | DQ235430 | Unknown                                | Unknown                                                          |
| <i>Mantidactylus</i> sp. 39 | <i>Mantidactylus</i> spp. aff. <i>femoralis</i>                          | Marojejy                             | FGZC 2884               | FJ559264 | Unknown                                | Unknown                                                          |
| <i>Mantidactylus</i> sp. 40 | <i>Mantidactylus</i> spp. aff. <i>femoralis</i>                          | Manongarivo                          | ZSM 855/2003            | FJ559265 | Unknown                                | Morphological and color differences                              |
| <i>Mantidactylus</i> sp. 41 | <i>Mantidactylus</i> sp. aff. <i>majori</i> "Andapa"                     | Andapa                               | FGZC 2719               | FJ559266 | Unknown                                | Morphological differences (head shape reminds <i>M. majori</i> ) |

|                                 |                                                           |                    |                             |          |                         |                                           |
|---------------------------------|-----------------------------------------------------------|--------------------|-----------------------------|----------|-------------------------|-------------------------------------------|
| <i>Mantidactylus</i> sp. 42     | <i>Mantidactylus</i> spp. aff. <i>femoralis</i>           | Montagne d'Ambre   | UADBA<br>(FGMV 2002.929)    | FJ559267 | Unknown                 | Not assessed                              |
| <i>Mantidactylus</i> sp. 43     | <i>Mantidactylus</i> spp. aff. <i>femoralis</i>           | Marojejy           | FGZC 2797                   | FJ559268 | Unknown                 | Not assessed                              |
| <i>Mantidactylus</i> sp. 44     | <i>Mantidactylus</i> spp. aff. <i>femoralis</i>           | Ambohitsara        | ZCMV 5865                   | FJ559269 | Qualitative difference  | Different morphology                      |
| <i>Mantidactylus</i> sp. 45     | <i>Mantidactylus</i> spp. aff. <i>mocquardi</i>           | Manongarivo        | ZSM 854/2003                | FJ559270 | Unknown                 | Morphological differences                 |
| <i>Mantidactylus</i> sp. 46     | <i>Mantidactylus</i> spp. aff. <i>mocquardi</i>           | Marojejy           | ZCMV 2024                   | FJ559271 | Unknown                 | Morphological differences                 |
| <i>Mantidactylus</i> sp. 47     | <i>Mantidactylus</i> spp. aff. <i>mocquardi</i>           | Ambatolahy         | ZCMV 2860                   | FJ559272 | Unknown                 | Morphological differences                 |
| <i>Mantidactylus</i> sp. 48     | <i>Mantidactylus</i> sp. aff. <i>cowanii</i> "small"      | Itremo             | ZSM 754/2001                | FJ559273 | Unknown                 | Distinct morphological differences        |
| <i>Mantidactylus</i> sp. 49     | <i>Mantidactylus</i> sp. aff. <i>lugubris</i> "Tolagnaro" | Andohahela         | ZSM 69/2004                 | AY848174 | Unknown                 | Distinct morphological differences        |
| <i>Mantidactylus</i> sp. 50     | Not included                                              | Moramena (Masoala) | MVTIS FA-m63                | AY848181 | Unknown                 | Unknown                                   |
| <i>Mantidactylus</i> sp. 52     | <i>Mantidactylus</i> sp. aff. <i>lugubris</i> "Marojejy"  | Marojejy           | FGZC 2767                   | FJ559274 | Unknown                 | Distinct morphological differences        |
| <i>Mantidactylus</i> sp. 53     | Not included                                              | Masoala            | FAZC 5132                   | AY848173 | Unknown                 | Unknown                                   |
| <i>Mantidactylus</i> sp. 54     | Not included                                              | Besariaka          | FAZC 7609                   | AY848180 | Unknown                 | Unknown                                   |
| <i>Mantidactylus</i> sp. 55     | Not included                                              | Betampona          | MVTIS AC806 /<br>FAZC 13578 | FJ559275 | Unknown                 | Unknown                                   |
| <i>Mantidactylus</i> sp. 56     | Not included                                              | Betampona          | MVTIS AC809 /<br>FAZC 13579 | FJ559276 | Unknown                 | Unknown                                   |
| <i>Mantidactylus</i> sp. 57     | <i>Mantidactylus</i> sp. aff. <i>grandidieri</i> "North"  | Nosy Mangabe       | ZCMV 2158                   | FJ559277 | Not assessed            | Morphological differences                 |
| <i>Mantidactylus</i> sp. 58     | Not included                                              | Ranomafana         | MVTIS HG1-HP4               | FJ559278 | Unknown                 | Unknown                                   |
| <i>Mantidactylus</i> sp. 59     | Not included                                              | Ranomafana         | MVTIS HG1-HP1               | FJ559279 | Qualitative differences | Morphological differences (tympanum size) |
| <i>Mantidactylus</i> sp. 60     | Not included                                              | Mahasoa forest     | ZCMV 8811                   | FJ559280 | Unknown                 | Unknown                                   |
| <i>Mantidactylus tricinctus</i> | <i>Mantidactylus tricinctus</i>                           | Manombo            | ZMA 20100                   | AY848128 |                         |                                           |
| <i>Mantidactylus tricinctus</i> | <i>Mantidactylus</i> sp. aff. <i>tricinctus</i> "AnAla"   | An'Ala             | ZCMV 1404                   | FJ559281 | No call differences     | No morphological differences              |
| <i>Mantidactylus ulcerosus</i>  | <i>Mantidactylus ulcerosus</i>                            | Ankarafantsika     | FGMV 2001.403               | FJ559282 |                         |                                           |
| <i>Mantidactylus zipperi</i>    | <i>Mantidactylus zipperi</i>                              | An'Ala             | ZCMV 1403                   | FJ559283 |                         |                                           |

|                                   |                                              |                          |                         |           |                                   |                                      |
|-----------------------------------|----------------------------------------------|--------------------------|-------------------------|-----------|-----------------------------------|--------------------------------------|
| <i>Mantidactylus zolitschka</i>   | <i>Mantidactylus zolitschka</i>              | An'Ala                   | ZSM 184/2003            | AY324811  |                                   |                                      |
| <i>Paradoxophyla palmata</i>      | <i>Paradoxophyla palmata</i>                 | Ranomafana               | ZSM 792/2003            | AY834188  |                                   |                                      |
| <i>Paradoxophyla tiarano</i>      | <i>Paradoxophyla tiarano</i>                 | Masoala                  | FAZC 10430              | AY834186  |                                   |                                      |
| <i>Platypelis barbouri</i>        | <i>Platypelis barbouri</i>                   | Andasibe                 | ZSM 1/2002              | EU341097  |                                   |                                      |
| <i>Platypelis barbouri</i>        | <i>Platypelis barbouri</i>                   | Antara                   | FAZC 5528               | FJ559284  |                                   |                                      |
| <i>Platypelis grandis</i>         | <i>Platypelis grandis</i>                    | Montagne d'Ambre         | UADBA 24118             | EU341099  |                                   |                                      |
| <i>Platypelis grandis</i>         | <i>Platypelis grandis</i>                    | Andohahela               | UADBA (FGZC 180)        | EU341095  | Unknown                           | No obvious morphological differences |
| <i>Platypelis mavomavo</i>        | <i>Platypelis mavomavo</i>                   | Ambolokopatrika          | MRSN A2434              | FJ559285  |                                   |                                      |
| <i>Platypelis milloti</i>         | <i>Platypelis milloti</i>                    | Manongarivo              | ZSM 817/2003            | AY4594103 |                                   |                                      |
| <i>Platypelis pollicaris</i>      | <i>Platypelis pollicaris</i>                 | Ambohitantly             | FGZC 2104               | EU341098  |                                   |                                      |
| <i>Platypelis pollicaris</i>      | <i>Platypelis pollicaris</i>                 | Farimazava               | FAZC 11456              | FJ559286  |                                   |                                      |
| <i>Platypelis</i> sp. 1           | Not included                                 | Sahavontsira             | MVTIS AC456 / FAZC 5634 | FJ559287  | Unknown                           | Unknown                              |
| <i>Platypelis</i> sp. 2           | Not included                                 | Betampona                | MVTIS AC545 / FAZC 5687 | FJ559288  | Unknown                           | Unknown                              |
| <i>Platypelis</i> sp. 3           | Not included                                 | Ambolokopatrika          | FAZC 7148               | AY594097  | Unknown                           | Unknown                              |
| <i>Platypelis</i> sp. 4           | <i>Platypelis</i> sp. aff. <i>mavomavo</i> 2 | Marojejy                 | FGZC 2813               | EU341101  | Unknown                           | Distinct differences in color        |
| <i>Platypelis</i> sp. 5           | Not included                                 | Manombo                  | ZCMV 5492               | FJ559289  | Distinct quantitative differences | Not assessed                         |
| <i>Platypelis</i> sp. 6           | <i>Platypelis pollicaris</i>                 | Ranomafana               | ZSM 791/2003            | AY594101  | Unknown                           | Differences in color                 |
| <i>Platypelis</i> sp. 7           | <i>Platypelis</i> spp.                       | Marojejy                 | ZCMV 2012               | FJ559290  | Unknown                           | Differences in morphology            |
| <i>Platypelis</i> sp. 8           | <i>Platypelis</i> sp. aff. <i>mavomavo</i>   | Manarikoba (Tsaratanana) | MVTIS 2001F48           | EU341096  | Unknown                           | Distinct color differences           |
| <i>Platypelis</i> sp. 9           | <i>Platypelis cowani</i>                     | Betampona                | FAZC 13567              | FJ559291  | Unknown                           | Unknown                              |
| <i>Platypelis</i> sp. 10          | Not included                                 | Andranomapanga           | ZCMV 8866               | FJ559292  | Unknown                           | Distinct color differences           |
| <i>Platypelis tuberifera</i>      | <i>Platypelis tuberifera</i>                 | Andasibe                 | ZSM 2/2002              | EU341093  |                                   |                                      |
| <i>Platypelis tuberifera</i>      | <i>Platypelis tuberifera</i>                 | Marojejy                 | FGZC 2840               | EU352823  |                                   |                                      |
| <i>Plethodontohyla bipunctata</i> | <i>Plethodontohyla bipunctata</i>            | Andohahela               | ZSM 89/2004             | EU341068  |                                   |                                      |
| <i>Plethodontohyla brevipes</i>   | <i>Plethodontohyla brevipes</i>              | Maharira                 | ZMA (ZCMV 270)          | EU341063  |                                   |                                      |

|                                       |                                       |                  |                     |          |         |                                                                |
|---------------------------------------|---------------------------------------|------------------|---------------------|----------|---------|----------------------------------------------------------------|
| <i>Plethodontohyla fonetana</i>       | <i>Plethodontohyla fonetana</i>       | Bemaraha         | ZSM 123/2006        | EU341058 |         |                                                                |
| <i>Plethodontohyla guentheri</i>      | <i>Plethodontohyla guentheri</i>      | Marojejy         | FGZC 2814           | EU341059 |         |                                                                |
| <i>Plethodontohyla inguinalis</i>     | <i>Plethodontohyla inguinalis</i>     | Vohiparara       | ZMA 20223           | EU341057 |         |                                                                |
| <i>Plethodontohyla mihanika</i>       | <i>Plethodontohyla mihanika</i>       | Ranomafana       | UADBA<br>(ZCMV 308) | EU341056 |         |                                                                |
| <i>Plethodontohyla notosticta</i>     | <i>Plethodontohyla notosticta</i>     | Nosy Mangabe     | ZCMV 2106           | EU341061 |         |                                                                |
| <i>Plethodontohyla notosticta</i>     | <i>Plethodontohyla notosticta</i>     | Manombo          | ZCMV 471            | EU341060 |         |                                                                |
| <i>Plethodontohyla ocellata</i>       | <i>Plethodontohyla ocellata</i>       | Ambohitsara      | UADBA<br>(ZCMV 88)  | EU341062 |         |                                                                |
| <i>Plethodontohyla</i> sp. 1          | Not included                          | Ambatolahy       | ZCMV 555            | EU341067 | Unknown | Differences in color and probably slightly in morphology       |
| <i>Plethodontohyla</i> sp. 2          | Not included                          | Tsaranana        | MVTIS 2001E50       | FJ559293 | Unknown | Unknown                                                        |
| <i>Plethodontohyla</i> sp. 3          | Not included                          | Betampona        | FAZC 13902          | FJ559294 | Unknown | Distinct morphological differences                             |
| <i>Plethodontohyla tuberata</i>       | <i>Plethodontohyla tuberata</i>       | Manjakatombo     | ZSM 375/2000        | EU341064 |         |                                                                |
| <i>Ptychadena mascareniensis</i>      | <i>Ptychadena mascareniensis</i>      | Ambanja          | ZSM 421/2000        | AY517591 |         |                                                                |
| <i>Ptychadena mascareniensis</i>      | <i>Ptychadena mascareniensis</i>      | Sambava          | ZSM 562/2000        | AY517594 | Unknown | No obvious differences                                         |
| <i>Rhombophryne alluaudi</i>          | <i>Rhombophryne alluaudi</i>          | Torotorofotsy    | ZCMV 968            | EU341105 |         |                                                                |
| <i>Rhombophryne coronata</i>          | <i>Rhombophryne coronata</i>          | Mandraka         | ZSM 694/2001        | EU341103 |         |                                                                |
| <i>Rhombophryne coudreaui</i>         | <i>Rhombophryne coudreaui</i>         | Betampona        | FAZC 13887          | FJ559299 |         |                                                                |
| <i>Rhombophryne laevipes</i>          | <i>Rhombophryne laevipes</i>          | Montagne d'Ambre | ZSM 218/2004        | EU341104 |         |                                                                |
| <i>Rhombophryne minuta</i>            | <i>Rhombophryne minuta</i>            | Marojejy         | FGZC 2899           | EU341106 |         |                                                                |
| <i>Rhombophryne serratopalpebrosa</i> | <i>Rhombophryne serratopalpebrosa</i> | Ambolokopatrika  | FAZC 7292           | EU341111 |         |                                                                |
| <i>Rhombophryne</i> sp. 1             | Not included                          | Ilampy           | FAZC 10314          | FJ559295 | Unknown | Unknown                                                        |
| <i>Rhombophryne</i> sp. 2             | Not included                          | Marojejy         | FGZC 2896           | EU341102 | Unknown | Morphological differences to all described <i>Rhombophryne</i> |
| <i>Rhombophryne</i> sp. 3             | Not included                          | Tsaranana        | ZSM 667/2001        | FJ559296 | Unknown | Not assessed                                                   |
| <i>Rhombophryne</i> sp. 4             | Not included                          | Marojejy         | ZCMV 2065           | FJ559297 | Unknown | Not assessed                                                   |

|                                       |                                              |                            |                         |          |                         |                                                                                                    |
|---------------------------------------|----------------------------------------------|----------------------------|-------------------------|----------|-------------------------|----------------------------------------------------------------------------------------------------|
| <i>Rhombophryne</i> sp. 5             | <i>Rhombophryne</i> sp. aff. <i>minuta</i>   | NosyMangabe                | ZCMV 886                | EU341109 | Unique call             | Morphological differences to all described                                                         |
| <i>Rhombophryne</i> sp. 6             | <i>Rhombophryne serratopalpebrosa</i>        | Marojejy                   | FGZC 2842               | EU341107 | Unknown                 | <i>Rhombophryne</i> Morphological differences to other <i>Rhombophryne</i> with supraocular spines |
| <i>Rhombophryne</i> sp. 7             | Not included                                 | Tsaratanana                | MVTIS 2001G46           | EU341108 | Unknown                 | Not assessed                                                                                       |
| <i>Rhombophryne</i> sp. 8             | Not included                                 | Forêt d'Ambre              | FGZC 1888               | FJ559298 | Qualitative differences | Distinct morphological differences to <i>R. testudo</i>                                            |
| <i>Rhombophryne</i> sp. 9             | <i>Rhombophryne coudreaui</i>                | Masoala                    | MRSN A2115              | AY594110 | Unknown                 | Morphological differences                                                                          |
| <i>Rhombophryne</i> sp. 10            | Not included                                 | Masoala (Ilampy)           | FAZC 10312 / MRSN A2610 | AY594111 | Unknown                 | Unknown                                                                                            |
| <i>Rhombophryne testudo</i>           | <i>Rhombophryne testudo</i>                  | Nosy Be                    | ZSM 475/2000            | AY594125 |                         |                                                                                                    |
| <i>Scaphiophryne boribory</i>         | <i>Scaphiophryne boribory</i>                | Fierenana region           | ZSM 644/2000            | AJ314810 |                         |                                                                                                    |
| <i>Scaphiophryne brevis</i>           | <i>Scaphiophryne brevis</i>                  | Berenty                    | ZSM 162/2002            | AY834195 |                         |                                                                                                    |
| <i>Scaphiophryne calcarata</i>        | <i>Scaphiophryne</i> aff. <i>calcarata A</i> | Ampijoroa (Ankarafantsika) | ZSM 715/2001            | AJ314811 |                         |                                                                                                    |
| <i>Scaphiophryne gottlebei</i>        | <i>Scaphiophryne gottlebei</i>               | Isalo region               | ---                     | AF215385 |                         |                                                                                                    |
| <i>Scaphiophryne madagascariensis</i> | <i>Scaphiophryne madagascariensis</i>        | Andringitra                | MVTIS TAD               | AY834190 |                         |                                                                                                    |
| <i>Scaphiophryne marmorata</i>        | <i>Scaphiophryne marmorata</i>               | Andasibe                   | ZSM 4/2002              | AY834191 |                         |                                                                                                    |
| <i>Scaphiophryne menabensis</i>       | <i>Scaphiophryne menabensis</i>              | Kirindy                    | ZSM 189/2003            | AY834189 |                         |                                                                                                    |
| <i>Scaphiophryne</i> sp. 1            | <i>Scaphiophryne</i> aff. <i>calcarata B</i> | Tolagnaro                  | ZSM 115/2002            | AY834193 | Qualitative differences | Not assessed                                                                                       |
| <i>Scaphiophryne spinosa</i>          | <i>Scaphiophryne spinosa</i>                 | pet trade                  | ---                     | AF215383 |                         |                                                                                                    |
| <i>Spinomantis aglavei</i>            | <i>Spinomantis aglavei</i>                   | Maharira                   | UADBA (ZCMV 240)        | AY848394 |                         |                                                                                                    |
| <i>Spinomantis aglavei</i>            | <i>Spinomantis aglavei</i>                   | Sahavontsira               | MVTIS AC476 / FAZC 5677 | FJ559300 |                         |                                                                                                    |
| <i>Spinomantis bertini</i>            | <i>Spinomantis bertini</i>                   | Andohahela                 | FGZC 2431               | FJ559301 |                         |                                                                                                    |
| <i>Spinomantis elegans</i>            | <i>Spinomantis elegans</i>                   | Andringitra                | ZSM 971/2003            | AY848405 |                         |                                                                                                    |
| <i>Spinomantis fimbriatus</i>         | <i>Spinomantis fimbriatus</i>                | Andasibe                   | MVTIS Tad417-2004       | FJ559302 |                         |                                                                                                    |



|                                 |                                                 |                           |                       |          |                                   |                                               |
|---------------------------------|-------------------------------------------------|---------------------------|-----------------------|----------|-----------------------------------|-----------------------------------------------|
| <i>Spinomantis fimbriatus</i>   | <i>Spinomantis fimbriatus</i>                   | Marojejy                  | FGZC 2852             | FJ559303 | No obvious differences            | No obvious differences                        |
| <i>Spinomantis guibei</i>       | <i>Spinomantis guibei</i>                       | Andohahela                | FGZC 2435             | FJ559304 |                                   |                                               |
| <i>Spinomantis massi</i>        | <i>Spinomantis massorum</i>                     | Manongarivo               | UADBA (FGMV 2002.803) | AY848412 |                                   |                                               |
| <i>Spinomantis microtis</i>     | <i>Spinomantis microtis</i>                     | Andohahela                | FGZC 2532             | FJ559305 |                                   |                                               |
| <i>Spinomantis peraccae</i>     | <i>Spinomantis peraccae</i>                     | Maharira                  | ZMA 20251             | AY848416 |                                   |                                               |
| <i>Spinomantis phantasticus</i> | <i>Spinomantis phantasticus</i>                 | Vohidrazana               | ZMA 19627             | AY848417 |                                   |                                               |
| <i>Spinomantis</i> sp. 2        | <i>Spinomantis fimbriatus</i>                   | Ranomafana                | ZSM 445/2004          | DQ060236 | Unknown                           | Unknown                                       |
| <i>Spinomantis</i> sp. 3        | Not included                                    | Masoala                   | FAZC 7629             | AY848387 | Unknown                           | Unknown                                       |
| <i>Spinomantis</i> sp. 4        | Not included                                    | Marojejy                  | FGZC 2278             | FJ559306 | Unknown                           | Unknown                                       |
| <i>Spinomantis</i> sp. 5        | <i>Spinomantis peraccae</i>                     | Tsaratana                 | MRSN 6737             | FJ559307 | Slight (quantitative) differences | Differences in color, possibly in morphology  |
| <i>Spinomantis</i> sp. 6        | <i>Spinomantis bertini</i>                      | Andohahela (low altitude) | UADBA (FGZC 148)      | AY848396 | Qualitative differences           | Distinct differences in morphology            |
| <i>Spinomantis</i> sp. 7        | <i>Spinomantis bertini</i>                      | Ranomafana                | ZSM 806/2003          | AY848400 | Unknown                           | Unknown                                       |
| <i>Spinomantis</i> sp. 8        | <i>Spinomantis</i> sp. aff. <i>bicalcaratus</i> | Maharira                  | ZMA 20044             | AY848382 | Unknown                           | Extreme differences in morphology and ecology |
| <i>Spinomantis</i> sp. 9        | <i>Spinomantis aglavei</i>                      | Mahasoa forest            | ZCMV 8817             | FJ559308 | Unknown                           | Unknown                                       |
| <i>Stumpffia gimmeli</i>        | <i>Stumpffia gimmeli</i>                        | Berara                    | ZSM 412/2000          | EU341084 |                                   |                                               |
| <i>Stumpffia grandis</i>        | <i>Stumpffia grandis</i>                        | Marojejy                  | FGZC 2820             | EU341078 |                                   |                                               |
| <i>Stumpffia helenae</i>        | <i>Stumpffia helenae</i>                        | Ambohitantely             | FGZC 2101             | EU341070 |                                   |                                               |
| <i>Stumpffia psologlossa</i>    | <i>Stumpffia psologlossa</i>                    | Benavony                  | MVTIS 2001-G54        | EU341066 |                                   |                                               |
| <i>Stumpffia pygmaea</i>        | <i>Stumpffia pygmaea</i>                        | Nosy Be                   | MVTIS 2001-F21        | EU341065 |                                   |                                               |
| <i>Stumpffia roseifemoralis</i> | <i>Stumpffia roseifemoralis</i>                 | Marojejy                  | FGZC 2858             | EU341072 |                                   |                                               |
| <i>Stumpffia</i> sp. 1          | Not included                                    | Ambohitsara               | ZCMV 5868             | FJ559309 | Different call                    | Not assessed                                  |
| <i>Stumpffia</i> sp. 2          | Not included                                    | Tsaratana                 | MRSN A2653            | AY594119 | Unknown                           | Unknown                                       |
| <i>Stumpffia</i> sp. 3          | Not included                                    | Antsirasira               | ZSM 597/2001          | FJ559310 | Unknown                           | Unknown                                       |
| <i>Stumpffia</i> sp. 4          | Not included                                    | Tsaratana                 | FGMV 2001.50          | FJ559311 | Unknown                           | Unknown                                       |

|                         |                                                       |                 |                  |          |                                   |                                                                                                                            |
|-------------------------|-------------------------------------------------------|-----------------|------------------|----------|-----------------------------------|----------------------------------------------------------------------------------------------------------------------------|
| <i>Stumpffia</i> sp. 5  | Not included                                          | Andapa          | FGZC 2725        | EU341074 | Unknown                           | Unknown                                                                                                                    |
| <i>Stumpffia</i> sp. 6  | <i>Stumpffia tridactyla</i>                           | Andasibe        | FGZC 2666        | EU341073 | Slight differences                | Slight differences; CCS because of very different phylogenetic placement from morphologically similar <i>S. tridactyla</i> |
| <i>Stumpffia</i> sp. 7  | Not included                                          | Marojejy        | FGZC 2826        | EU341083 | Unknown                           | Unknown                                                                                                                    |
| <i>Stumpffia</i> sp. 8  | <i>Stumpffia</i> sp. aff. <i>grandis</i>              | Vohidrazana     | FGZC 2677        | EU341076 | Quantitative differences          | Distinct color differences                                                                                                 |
| <i>Stumpffia</i> sp. 9  | <i>Stumpffia</i> sp. "Ranomafana"                     | Ranomafana      | ZMA 20201        | EU341071 | Quantitative differences          | Distinct color differences; karyological differences                                                                       |
| <i>Stumpffia</i> sp. 10 | <i>Stumpffia</i> sp. "Marojejy 2"                     | Marojejy        | FGZC 2729        | EU341079 | Quantitative differences          | Distinct color differences                                                                                                 |
| <i>Stumpffia</i> sp. 11 | Not included                                          | Ambolokopatrika | MRSN A2583       | AY594120 | Unknown                           | Not assessed in detail; CCS because of unique coloration                                                                   |
| <i>Stumpffia</i> sp. 12 | Not included                                          | Ambolokopatrika | MRSN A2651       | AY594121 | Unknown                           | Unknown                                                                                                                    |
| <i>Stumpffia</i> sp. 13 | <i>Stumpffia</i> sp. "Marojejy 1"                     | Marojejy        | FGZC 2751        | EU341075 | Quantitative differences          | Distinct color differences                                                                                                 |
| <i>Stumpffia</i> sp. 14 | <i>Stumpffia</i> sp. aff. <i>helenae</i> "Bemaraha"   | Bemaraha        | UADBA (FGZC 713) | EU341069 | Unknown                           | Slight morphological differences (size) to <i>S. helenae</i>                                                               |
| <i>Stumpffia</i> sp. 15 | <i>Stumpffia</i> sp. aff. <i>tetradactyla</i> "South" | Manombo         | ZMA 20171        | EU341082 | Not assessed                      | Not assessed; CCS because of highly divergent phylogenetic placement, corroborated by other markers                        |
| <i>Stumpffia</i> sp. 16 | <i>Stumpffia</i> sp. aff. <i>tetradactyla</i> "South" | Ste Luce        | FGZC 2661        | EU341081 | Not assessed                      | Not assessed; CCS because of highly divergent phylogenetic placement, corroborated by other markers                        |
| <i>Stumpffia</i> sp. 17 | Not included                                          | Betampona       | FAZC 13618       | FJ559312 | Unknown                           | Unknown                                                                                                                    |
| <i>Stumpffia</i> sp. 18 | Not included                                          | Mahasoa forest  | ZCMV 8803        | FJ559313 | Strong quantitative difference to | No obvious differences                                                                                                     |

|                               |                               |                       |            |          |                                                                                            |                               |
|-------------------------------|-------------------------------|-----------------------|------------|----------|--------------------------------------------------------------------------------------------|-------------------------------|
| <i>Stumpffia</i> sp. 19       | Not included                  | Mahasoa forest        | ZCMV 8802  | FJ559314 | sympatric <i>S.</i> sp. 19<br>String quantitative difference to sympatric <i>S.</i> sp. 18 | No obvious differences        |
| <i>Stumpffia</i> sp. 20       | Not included                  | Betampona             | FAZC 13903 | FJ559315 | Unknown                                                                                    | Unknown                       |
| <i>Stumpffia</i> sp. 21       | Not included                  | Ampombofofo           | FGZC 1951  | FJ559316 | Unknown                                                                                    | Unknown                       |
| <i>Stumpffia</i> sp. 22       | Not included                  | Nosy Hara             | FGZC 1293  | FJ559317 | Unknown                                                                                    | Strongly divergent morphology |
| <i>Stumpffia</i> sp. 23       | Not included                  | Ankarana              | FGZC 1612  | FJ559318 | Unknown                                                                                    | Probably divergent morphology |
| <i>Stumpffia</i> sp. 24       | Not included                  | Montagne des Francais | FGZC 1674  | FJ559319 | Unknown                                                                                    | Probably divergent morphology |
| <i>Stumpffia</i> sp. 25       | Not included                  | Montagne des Francais | FGZC 1103  | FJ559320 | Unknown                                                                                    | Unknown                       |
| <i>Stumpffia</i> sp. 26       | Not included                  | Ankarana              | FGZC 1620  | FJ559321 | Unknown                                                                                    | Unknown                       |
| <i>Stumpffia</i> sp. 27       | Not included                  | Montagne des Francais | FGZC 1901  | FJ559322 | Unknown                                                                                    | Unknown                       |
| <i>Stumpffia tetradactyla</i> | <i>Stumpffia tetradactyla</i> | Nosy Boraha           | ZCMV3395   | FJ559323 |                                                                                            |                               |
| <i>Stumpffia tetradactyla</i> | <i>Stumpffia tetradactyla</i> | Nosy Mangabe          | ZCMV 2143  | EU341077 | No obvious differences                                                                     | No obvious differences        |
| <i>Stumpffia tridactyla</i>   | <i>Stumpffia tridactyla</i>   | Marojejy              | FGZC 2844  | EU341080 |                                                                                            |                               |
| <i>Tsingymantis antitra</i>   | <i>Tsingymantis antitra</i>   | Ankarana              | FGZC 531   | AY848213 |                                                                                            |                               |
| <i>Wakea madinika</i>         | <i>Wakea madinika</i>         | Antsirrasira          | ---        | AY341703 |                                                                                            |                               |
